# Supplementary material for: Chiral 2-Aminobenzimidazole as Bifunctional Catalyst in the Asymmetric Electrophilic Amination of Unprotected 3-Substituted Oxindoles
Source: PubMed Central journal article supplement (PMC6099788; doi:10.3390/molecules23061374), 2018-06-06
Supplement: molecules-23-01374-s001.pdf [file molecules-23-01374-s001.pdf]

## SUPPORTING INFORMATION

### **Chiral 2-Aminobenzimidazole as Bifunctional Catalyst in the Asymmetric Electrophilic Amination of Unprotected 3-Substituted Oxindoles**

**Llorenç Benavent <sup>1</sup>, Alejandro Baeza <sup>1,\*</sup>, Megan Freckleton <sup>1</sup>**

Departamento de Química Orgánica, Facultad de Ciencias and Instituto de Síntesis Orgánica,

Alicante University. Apto. 99. E-03080, Alicante, Spain.

|                                                              |    |
|--------------------------------------------------------------|----|
| General Remarks and General Procedure                        | 1  |
| Physical and Spectroscopical Data of 3-Substituted Oxindoles | 2  |
| <sup>1</sup> H-NMR Spectra of 3-Substituted Oxindoles        | 5  |
| NMR Spectra of Amination Products                            | 15 |
| HPLC Chromatograms of Representative Compounds               | 28 |

### **General Remarks:**

All reagents were purchased from commercial sources and used without further purification. Substrates which were not commercially available were synthesized according to known literature procedures. Since the 3-substituted oxindoles were described in the literature, only  $^1\text{H}$  NMR is listed (see NMR spectra below). NMR spectra were performed on a Bruker AC-300 or Bruker Avance-400 400 (Bruker Corporation) using  $\text{CDCl}_3$  as solvent and TMS as internal standard unless otherwise stated. Optical rotations were measured on a Jasco P-1030 Polarimeter with a 5 cm cell (c given in g/100 mL). Enantioselectivities were determined by HPLC analysis (Agilent 1100 Series HPLC) equipped with a G1315B diode array detector and a Quat Pump G1311A (Agilent Technologies) equipped with the corresponding Daicel chiral column; the retention time of the major enantiomer is highlighted in bold. Analytical TLC was performed on Merck silica gel plates and the spots visualized with UV light at 254 nm (Merck millipore). Flash chromatography employed Merck silica gel 60 (0.040-0.063 mm) (Merck millipore).

### **General Procedure for the Asymmetric Amination of 3-Substituted Oxindoles**

In an open-air tube at room temperature (25 °C), the corresponding 3-substituted-oxindole (0.15 mmol) was added to a solution of organocatalyst **5** (10 mol%) in toluene (1 mL). After 5 minutes, the mixture was introduced into a cooling bath at 0 °C, and after two minutes di-*tert*-butylazodicarboxylate (0.11 mmol, 1.1 eq.) was added in one portion. The reaction was then allowed to react for 3 days. After this time, water (5 mL) and ethyl acetate (5 mL) were added, and the aqueous layer was then re-extracted twice (2 x 10 mL). The combined organic phases were dried ( $\text{MgSO}_4$ ) and evaporated under reduced pressure. Finally, the reaction crude was purified by column chromatography on silica gel or TLC preparative using hexane/ethyl acetate mixtures as eluent. Spectroscopic data are listed within the article.

## Physical and Spectroscopical Data of 3-substituted oxindoles

### *tert*-Butyl 3-methyl-2-oxindoline-1-carboxylate (1a').<sup>1</sup>

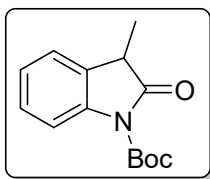

Yellow oil. (90% Yield)

<sup>1</sup>H-NMR (300 MHz, CDCl<sub>3</sub>):  $\delta_H = 7.43$  (d,  $J = 7.7$  Hz, 1H), 7.33 (dd,  $J = 7.6, 1.6$  Hz, 1H), 7.30–7.18 (m, 2H), 3.92 (q,  $J = 7.0$  Hz, 1H), 1.50 (d,  $J = 9.1$  Hz, 12H); <sup>13</sup>C-NMR (101 MHz, CDCl<sub>3</sub>)  $\delta_C = 177.33, 149.04, 138.68, 129.78, 124.99, 123.45, 115.28, 73.40, 29.68, 28.04, 25.68.$

### 5-bromo-3-methylindolin-2-one (1b):<sup>2</sup>

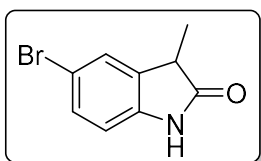

White solid. (>99% Yield)

<sup>1</sup>H-NMR (300 MHz, CDCl<sub>3</sub>)  $\delta_H = 8.88$  (s, 1H), 7.40–7.32 (m, 2H), 6.81 (d,  $J = 8.8$  Hz, 1H), 3.49 (q,  $J = 7.6$  Hz, 1H), 1.51 (d,  $J = 7.7$  Hz, 3H); <sup>13</sup>C-NMR (101 MHz, CDCl<sub>3</sub>)  $\delta_C = 180.99, 140.23, 133.28, 130.78, 127.09, 115.06, 111.27, 41.19, 15.10.$

### 3-Phenylindolin-2-one (1c):<sup>2</sup>

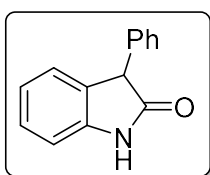

Pale yellow solid. (78% Yield)

<sup>1</sup>H-NMR (300 MHz, CDCl<sub>3</sub>):  $\delta_H = 8.25$  (bs, 1H), 7.39–7.25 (m, 4H), 7.24–7.21 (m, 2H), 7.14 (d,  $J = 7.4$  Hz, 1H), 7.04 (td,  $J = 7.5, 0.9$  Hz, 1H), 6.94 (d,  $J = 7.8$  Hz, 1H), 4.64 (s, 1H); <sup>13</sup>C-NMR (101 MHz, CDCl<sub>3</sub>)  $\delta_C = 179.27, 141.84, 136.51, 129.69, 128.99, 128.54, 128.41, 127.69, 125.18, 122.70, 110.24, 52.86.$

### 3-allylindolin-2-one (1d):<sup>3</sup>

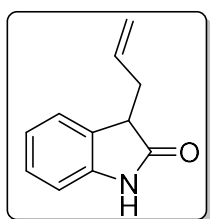

Pale yellow solid. (46% Yield)

<sup>1</sup>H-NMR (300 MHz, CDCl<sub>3</sub>)  $\delta_H = 8.95$  (s, 1H), 7.27 (d,  $J = 7.4$  Hz, 1H), 7.22 (t,  $J = 7.7$  Hz, 1H), 7.02 (td,  $J = 7.6, 0.8$  Hz, 1H), 6.91 (d,  $J = 7.7$  Hz, 1H), 5.86–5.69 (m, 1H), 5.09 (ddd,  $J = 13.6, 10.7, 0.9$  Hz, 2H), 3.54 (dd,  $J = 7.3, 5.0$  Hz, 1H), 2.91–2.78 (m, 1H), 2.60 (dt,  $J = 14.4, 7.7$  Hz, 1H); <sup>13</sup>C-NMR (101 MHz, CDCl<sub>3</sub>)  $\delta_C = 180.34, 141.67, 133.87, 129.25, 127.97, 124.38, 122.21, 118.10, 109.91, 45.83, 34.74.$

### Ethyl 2-(2-oxoindolin-3-yl)-acetate (1e):<sup>4</sup>

<sup>1</sup> Santanu Ghosh, S.; Chaudhuri, S.; Bisai, A. *Org. Lett.* **2015**, *17*, 1373-1376.

<sup>2</sup> Cheng, L.; Liu, L.; Wang, D.; Chen, Y.-J. *Org. Lett.* **2009**, *Vol. 11, No. 17*, 3874-3877.

<sup>3</sup> Prakash D., C.; Bor-Cherng, H. and Gene-Hsiang L. *Org. Lett.* **2017**, *19*, 6112-6115.

<sup>4</sup> Cao, S.-H.; Zhang, X.-C.; Wei, Y. and Shi, M. *Eur. J. Org. Chem.* **2011**, 2668–2672.

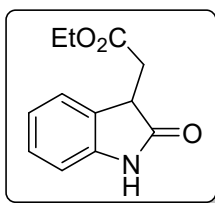

Red solid. (82% Yield)

$^1\text{H-NMR}$  (300 MHz,  $\text{CDCl}_3$ )  $\delta_{\text{H}} = 8.57$  (bs, 1H), 7.22 (t,  $J = 7.6$  Hz, 2H), 7.01 (t,  $J = 8.0$  Hz, 1H), 6.90 (d,  $J = 7.6$  Hz, 1H), 4.21–4.09 (m, 2H), 3.82 (dd,  $J = 7.8, 4.5$  Hz, 1H), 3.08 (dd,  $J = 16.9, 4.5$  Hz, 1H), 2.84 (dd,  $J = 16.9, 7.8$  Hz, 1H), 1.21 (t,  $J = 7.1$  Hz, 3H);  $^{13}\text{C-NMR}$  (101 MHz,  $\text{CDCl}_3$ )  $\delta_{\text{C}} = 179.56, 171.07, 141.66, 128.30, 124.19, 124.03, 122.45, 110.02, 61.02, 42.41, 34.76, 14.06$ .

### 3-benzylindolin-2-one (1f):<sup>2</sup>

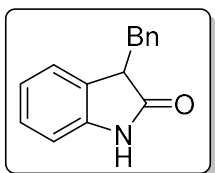

White solid. (82.8% Yield)

$^1\text{H-NMR}$  (300 MHz,  $\text{CDCl}_3$ ):  $\delta_{\text{H}} = 8.40$  (s, 1H), 7.26–7.13 (m, 6H), 6.90 (td,  $J = 7.6, 1.0$  Hz, 1H), 6.83 (d,  $J = 7.8$  Hz, 1H), 6.74 (d,  $J = 7.4$  Hz, 1H), 3.74 (dd,  $J = 9.2, 4.5$  Hz, 1H), 3.49 (dd,  $J = 13.7, 4.6$  Hz, 1H), 2.93 (dd,  $J = 13.7, 9.2$  Hz, 1H);  $^{13}\text{C-NMR}$  (101 MHz,  $\text{CDCl}_3$ )  $\delta_{\text{C}} = 179.77, 141.41, 137.78, 129.42, 128.97, 128.34, 127.97, 126.68, 124.83, 122.05, 109.79, 47.56, 36.62$ .

### 3-(4-methoxybenzyl)-indolin-2-one (1g):<sup>2</sup>

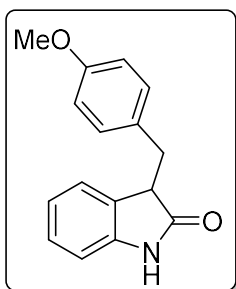

Yellow solid. (213 mg, 84% Yield)

$^1\text{H-NMR}$  (300 MHz,  $\text{CDCl}_3$ )  $\delta_{\text{H}} = 8.77$  (bs, 1H), 7.20–7.12 (m, 1H), 7.07 (d,  $J = 8.7$  Hz, 2H), 6.91 (td,  $J = 7.6, 1.0$  Hz, 1H), 6.84 (d,  $J = 7.7$  Hz, 1H), 6.81–6.74 (m, 3H), 3.76 (s, 3H), 3.70 (dd,  $J = 9.1, 4.5$  Hz, 1H), 3.41 (dd,  $J = 13.8, 4.6$  Hz, 1H), 2.90 (dd,  $J = 13.8, 9.0$  Hz, 1H);  $^{13}\text{C-NMR}$  (101 MHz,  $\text{CDCl}_3$ )  $\delta_{\text{C}} = 179.78, 158.31, 141.46, 130.40, 129.70, 129.07, 127.91, 124.82, 122.01, 113.69, 109.77, 55.18, 47.77, 35.74$ .

### 3-(4-nitrobenzyl)-indolin-2-one (1h):<sup>2</sup>

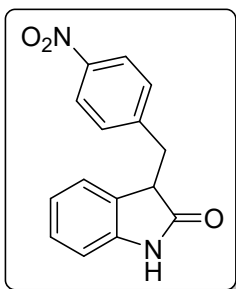

Brown solid. (167 mg, 62% Yield)

$^1\text{H-NMR}$  (300 MHz,  $\text{CDCl}_3$ )  $\delta_{\text{H}} = 8.07$  (d,  $J = 8.8$  Hz, 2H), 7.91 (s, 1H), 7.30 (d,  $J = 8.7$  Hz, 2H), 7.19 (dd,  $J = 11.6, 5.2$  Hz, 1H), 7.01–6.90 (m, 2H), 6.80 (d,  $J = 7.8$  Hz, 1H), 3.82 (dd,  $J = 7.6, 4.9$  Hz, 1H), 3.49 (dd,  $J = 13.7, 4.9$  Hz, 1H), 3.24 (dd,  $J = 13.7, 7.7$  Hz, 1H);  $^{13}\text{C-NMR}$  (101 MHz,  $\text{CDCl}_3$ )  $\delta_{\text{C}} = 178.17, 145.11, 141.12, 130.35, 128.50, 124.50, 123.46, 122.45, 109.89, 46.84, 36.06$ .

### 3-[4-(trifluoromethyl)benzyl]indolin-2-one (1i)<sup>2</sup>

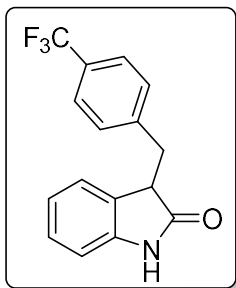

Yellow solid. (67% Yield)

<sup>1</sup>H-NMR (300 MHz, CDCl<sub>3</sub>)  $\delta_H$  = 8.51 (bs, 1H), 7.49 (d,  $J$  = 8.0 Hz, 2H), 7.27 (d,  $J$  = 7.2 Hz, 2H), 7.19 (t,  $J$  = 7.7 Hz, 1H), 6.95 (td,  $J$  = 7.6, 0.8 Hz, 1H), 6.84 (dd,  $J$  = 7.6, 2.9 Hz, 2H), 3.78 (dd,  $J$  = 8.4, 4.7 Hz, 1H), 3.48 (dd,  $J$  = 13.8, 4.6 Hz, 1H), 3.10 (dd,  $J$  = 13.8, 8.4 Hz, 1H); <sup>13</sup>C-NMR (101 MHz, CDCl<sub>3</sub>)  $\delta_C$  = 178.70, 141.67, 141.21, 129.78, 128.28, 125.24, 125.21, 124.62, 122.30,

109.82, 47.06, 36.20.

### 5-methyl-3-phenylbenzofuran-2(3H)-one (10).<sup>5</sup>

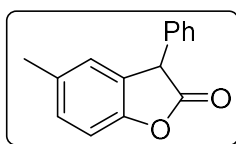

White solid; (100 mg, 44% Yield)

<sup>1</sup>H-NMR (300 MHz, CDCl<sub>3</sub>)  $\delta_H$  = 7.39–7.31 (m, 3H), 7.22 (dt,  $J$  = 5.3, 2.1 Hz, 2H), 7.17–7.12 (m, 1H), 7.06 (d,  $J$  = 8.2 Hz, 1H), 7.00 (d,  $J$  = 0.6 Hz, 1H), 4.84 (s, 1H), 2.32 (s, 3H); <sup>13</sup>C-NMR (101

MHz, CDCl<sub>3</sub>)  $\delta_C$  = 175.44, 151.86, 135.35, 134.20, 129.76, 129.13, 128.31, 128.17, 127.00, 125.74, 110.46, 49.94, 21.11.

<sup>5</sup> Bhaskar B., D.; Manoj K., C. and Sandip K., N. *Synth. Commun.* **2016**, *46*, 1772-1780.

# <sup>1</sup>H-NMR SPECTRA OF 3-SUBSTITUTED OXINDOLES

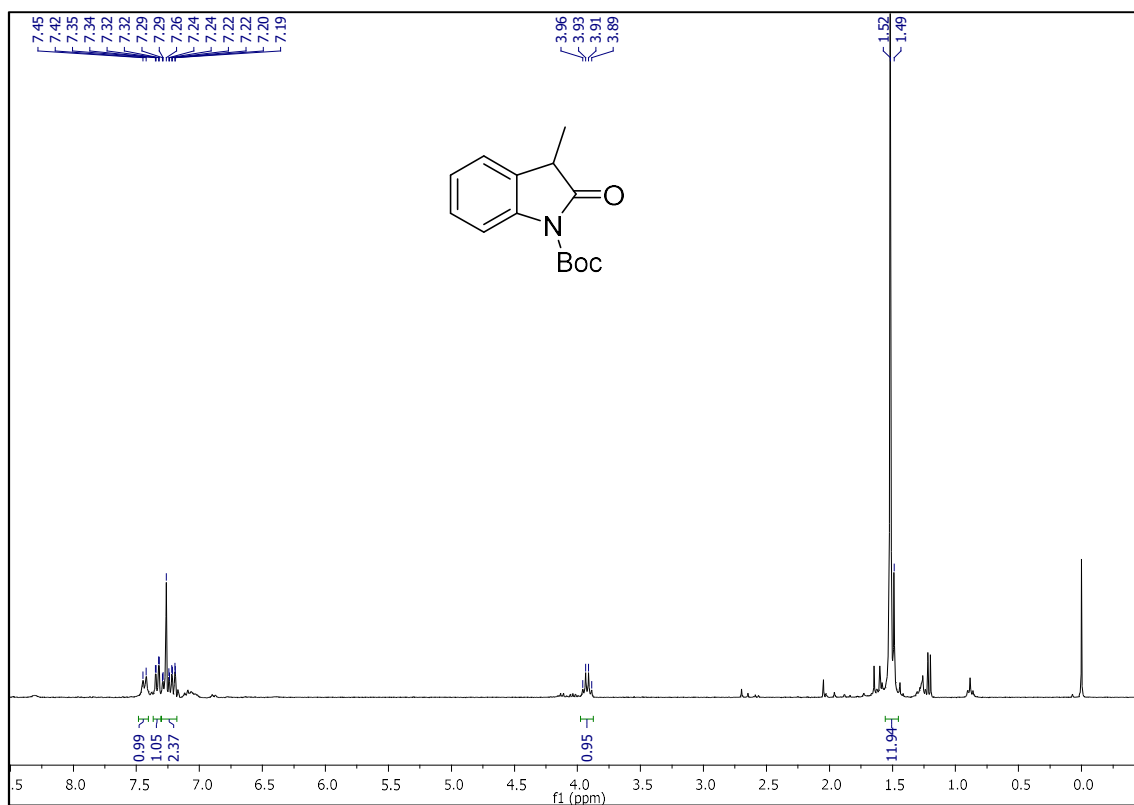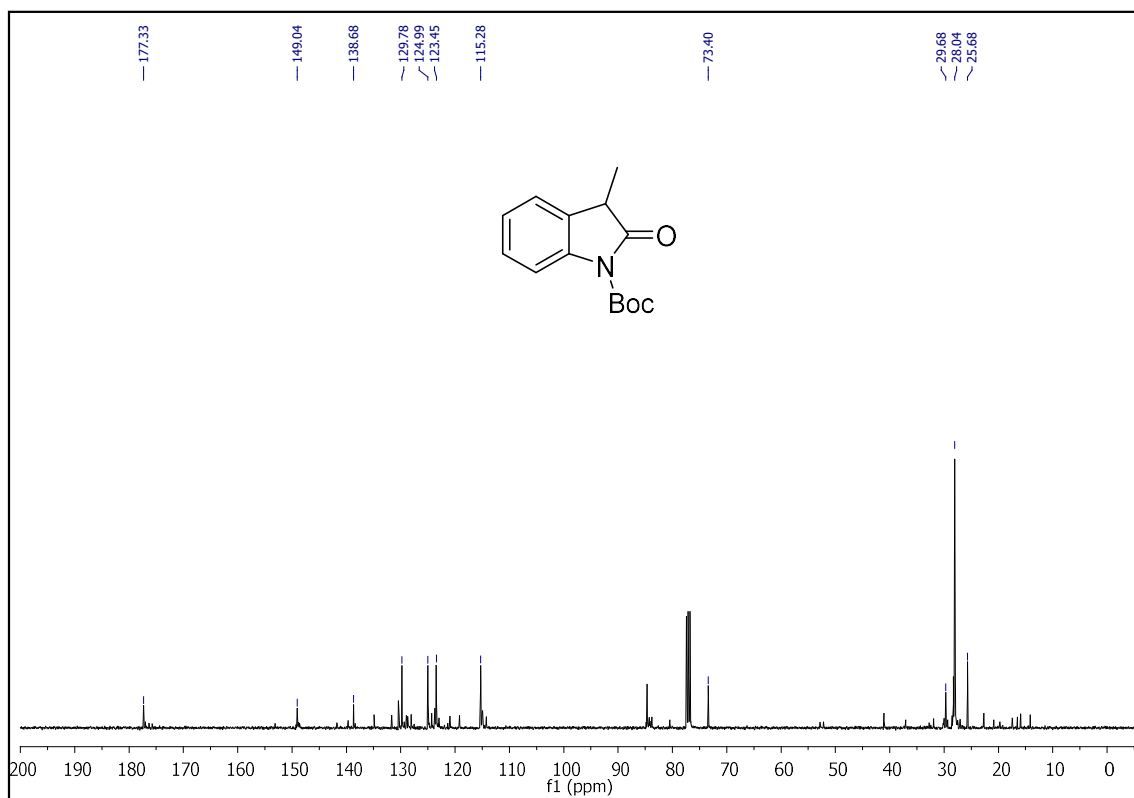

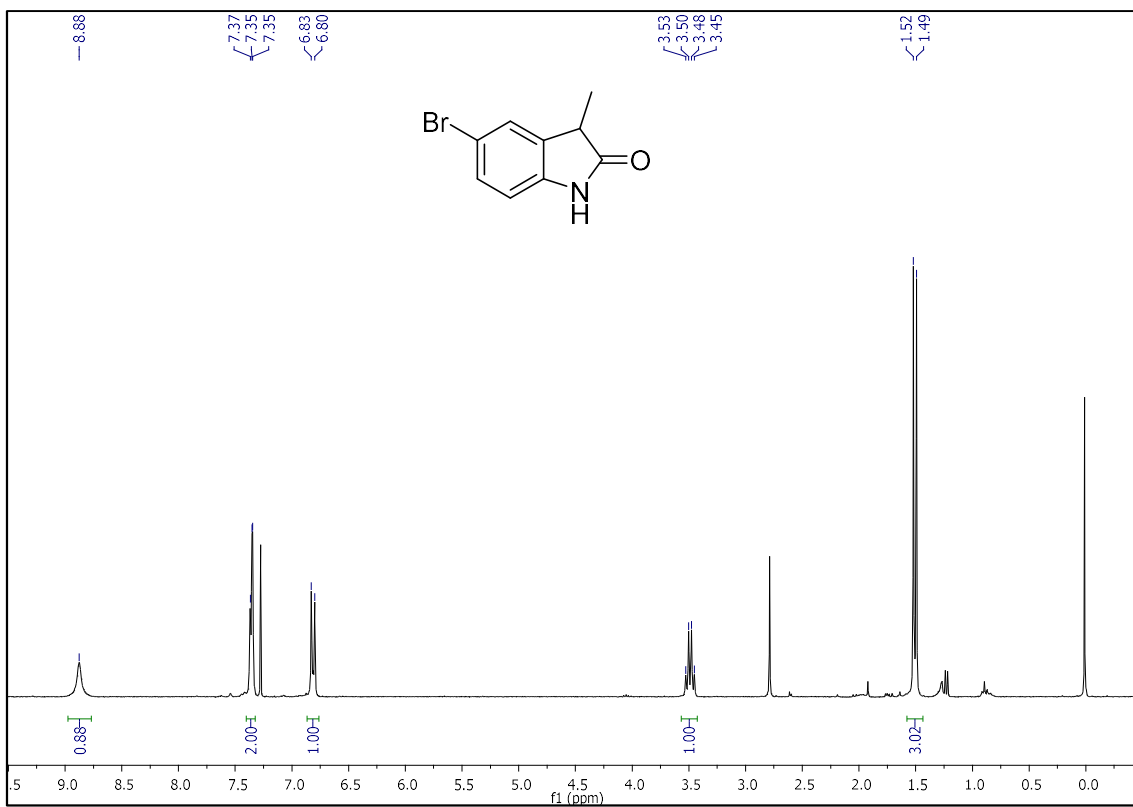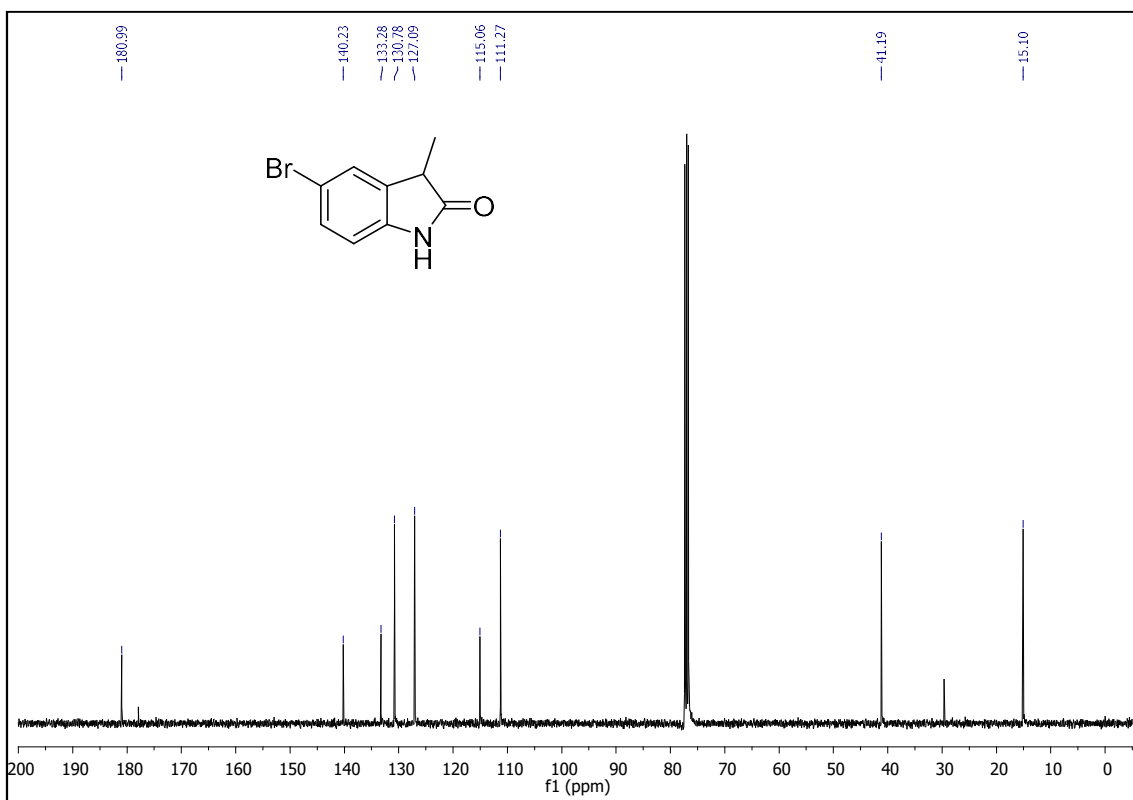

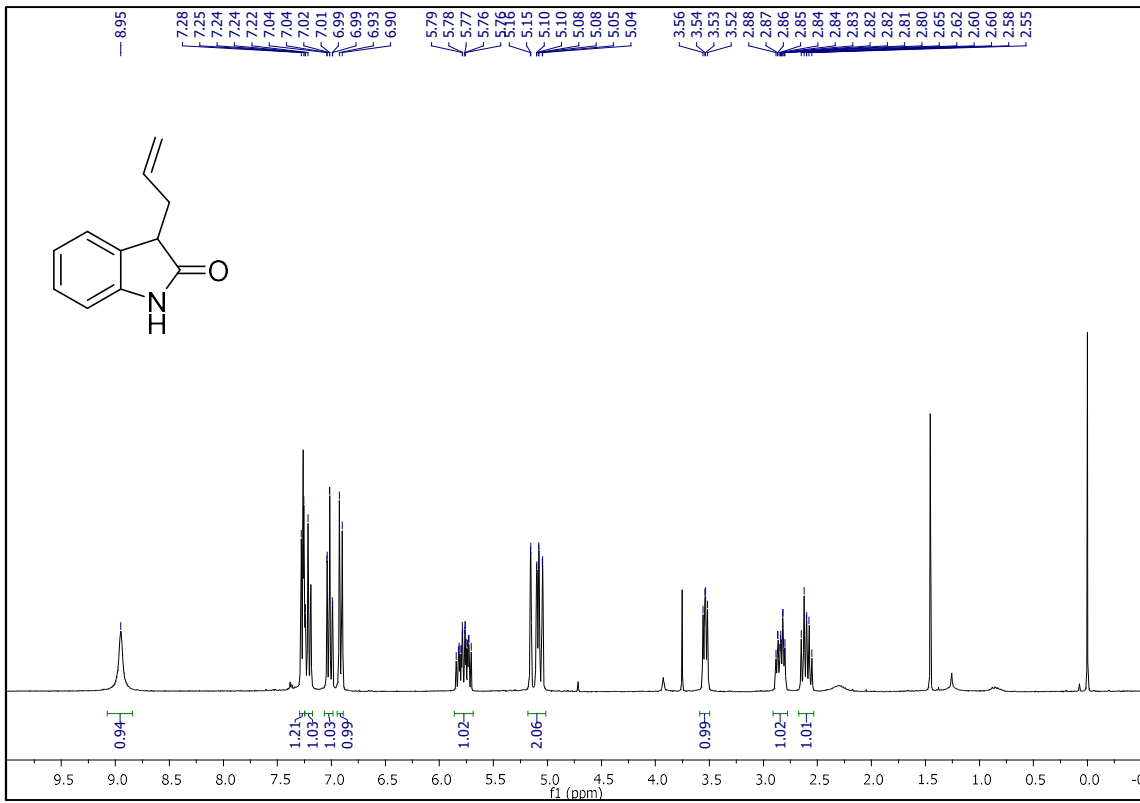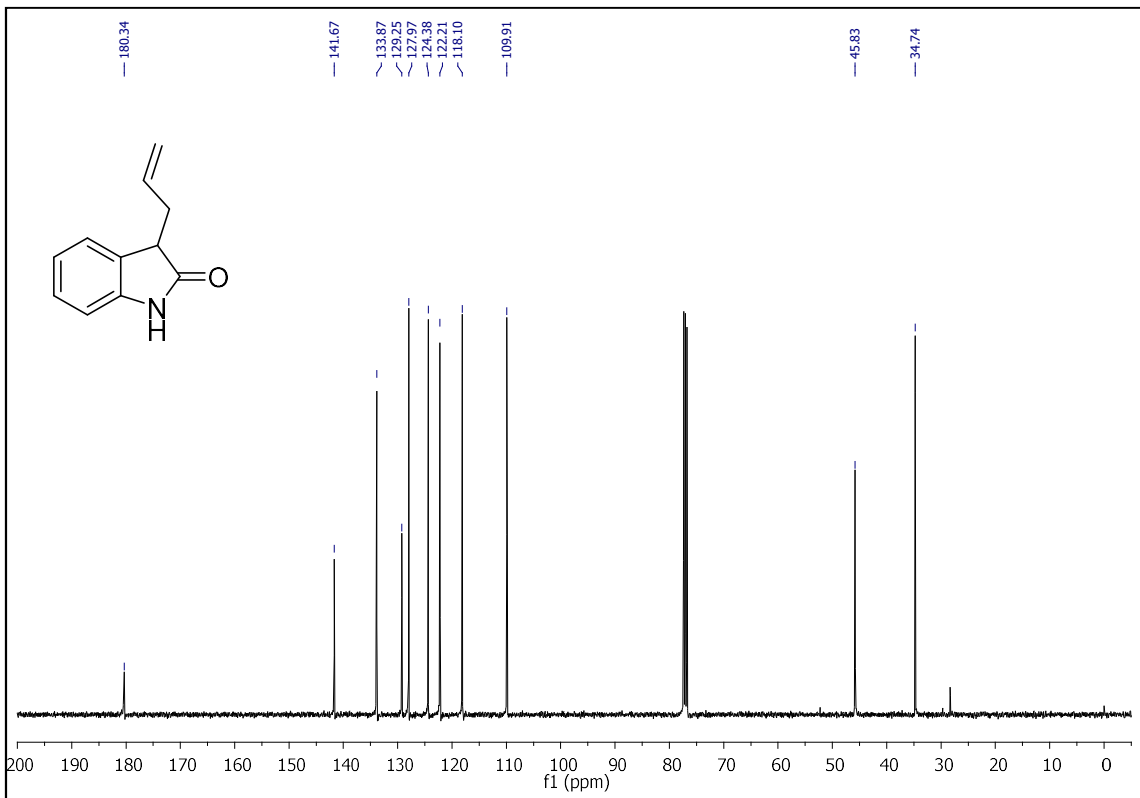



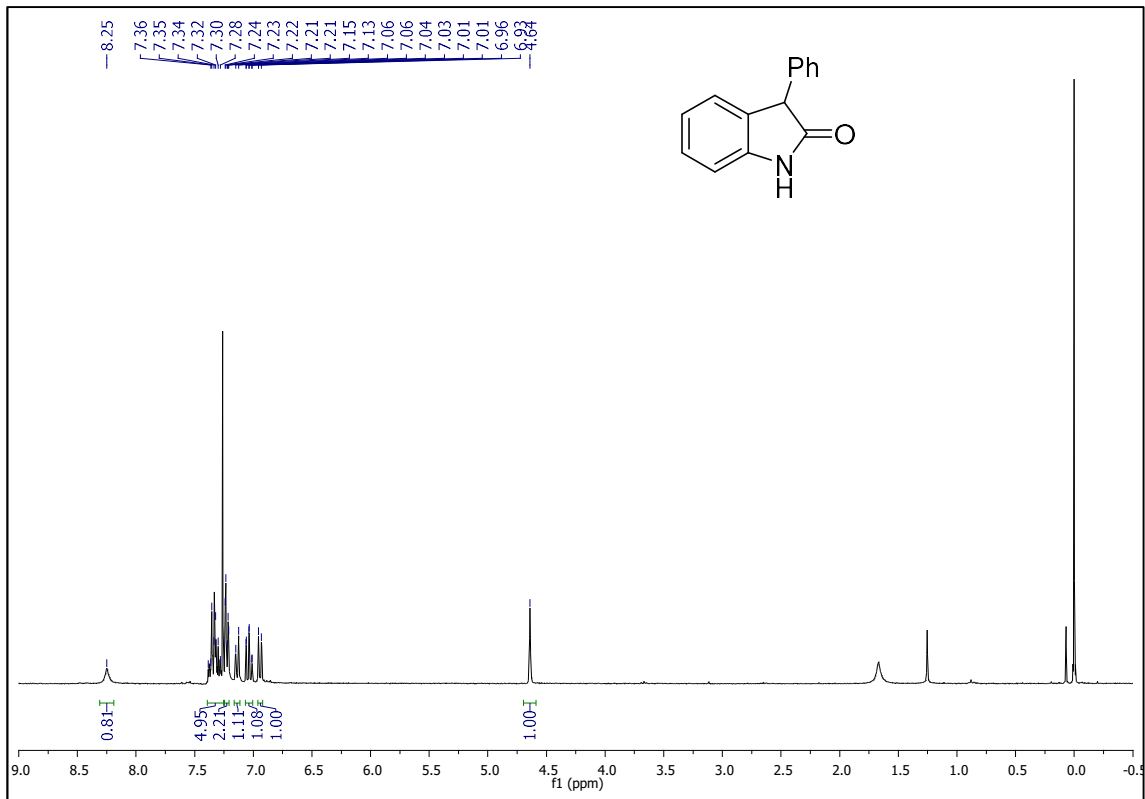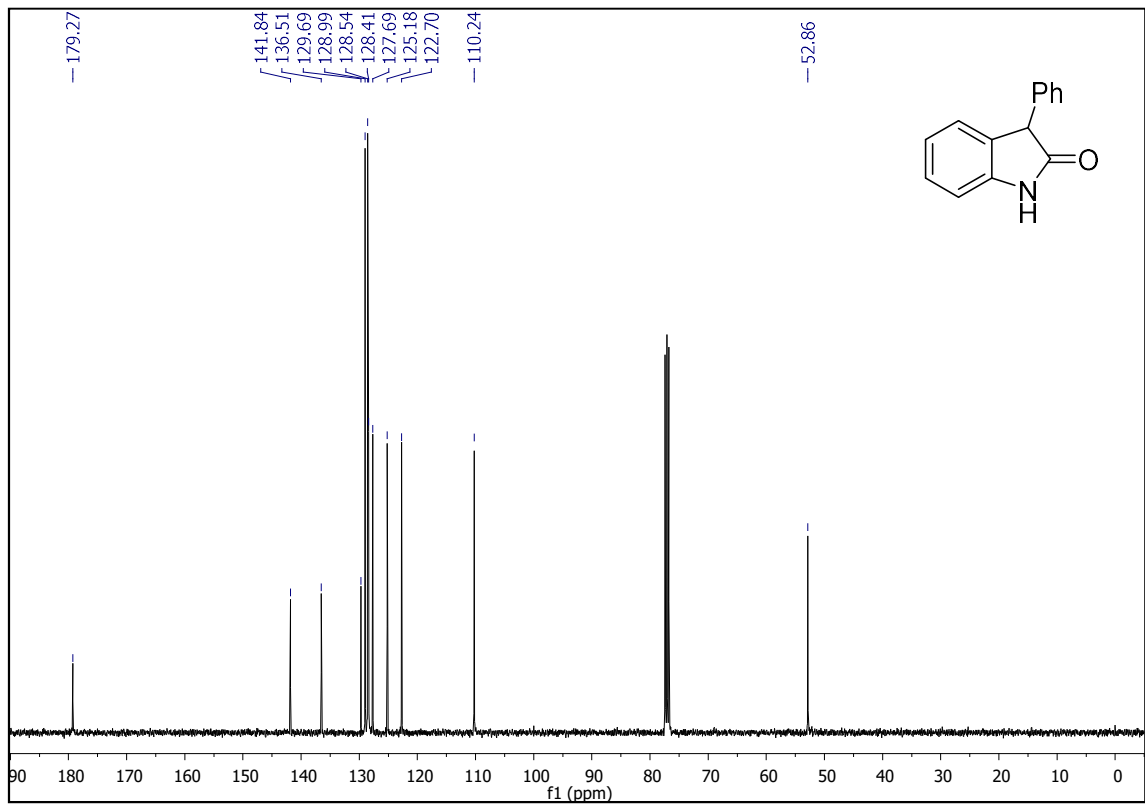

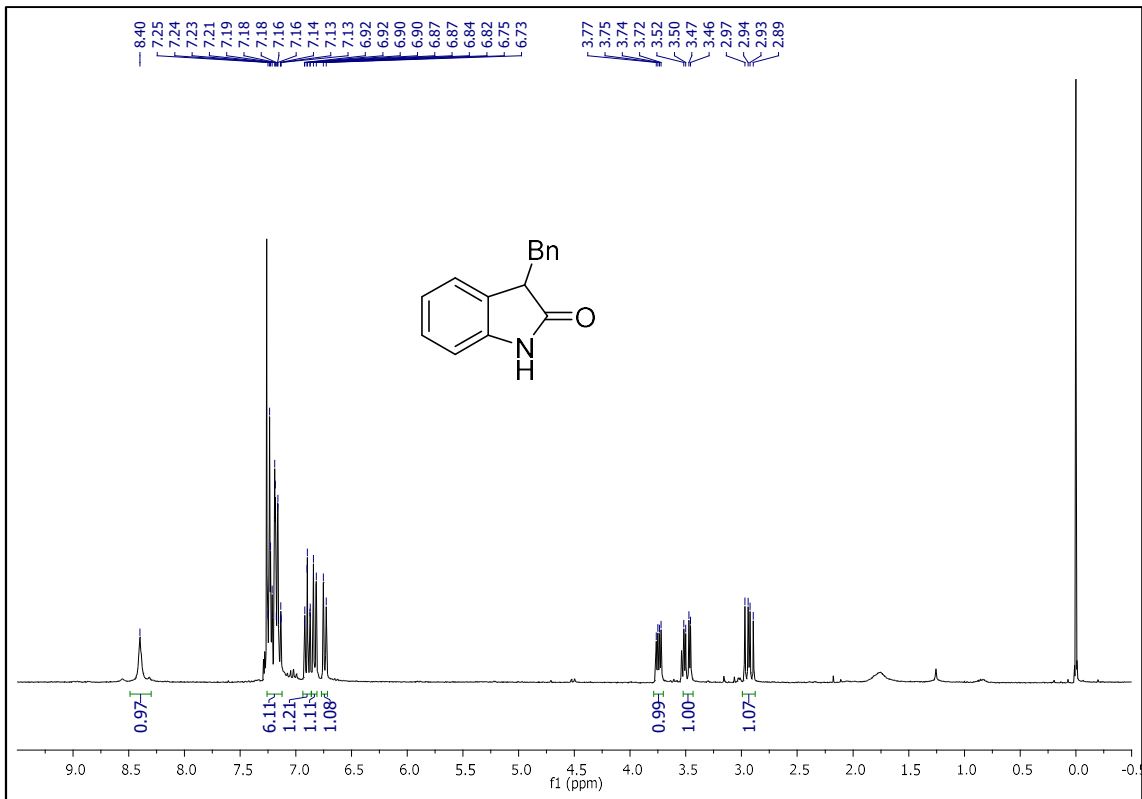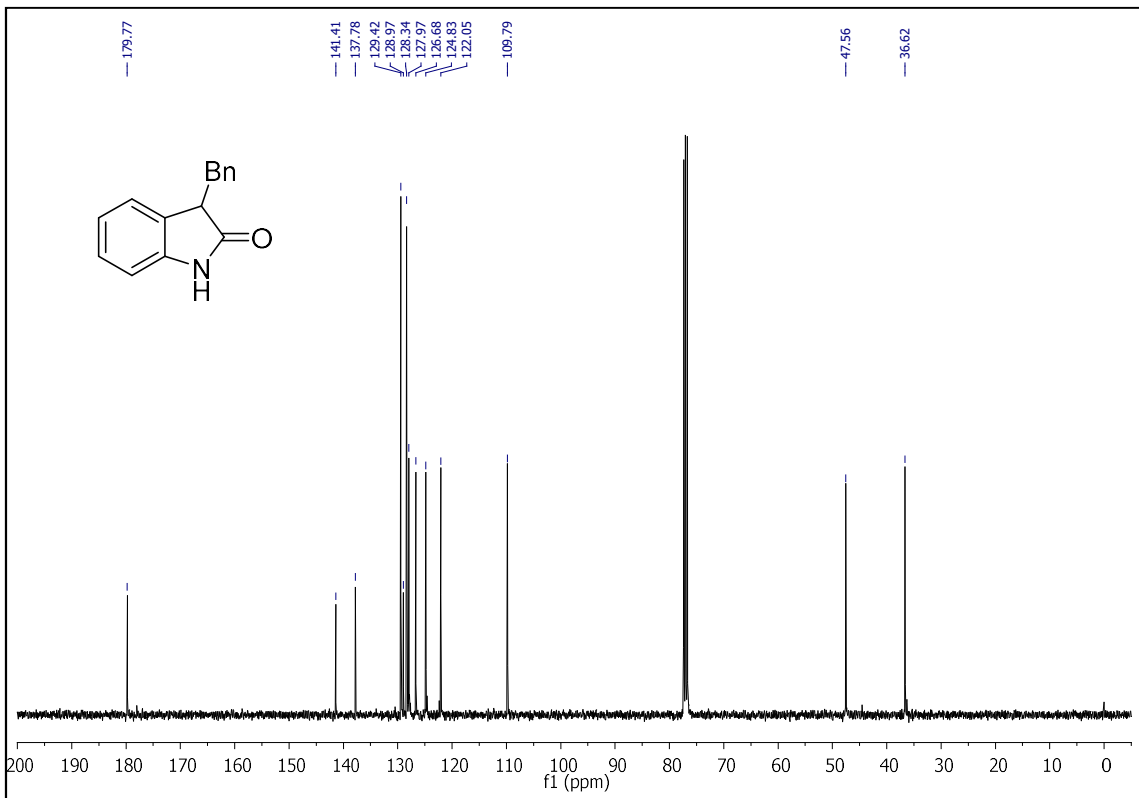

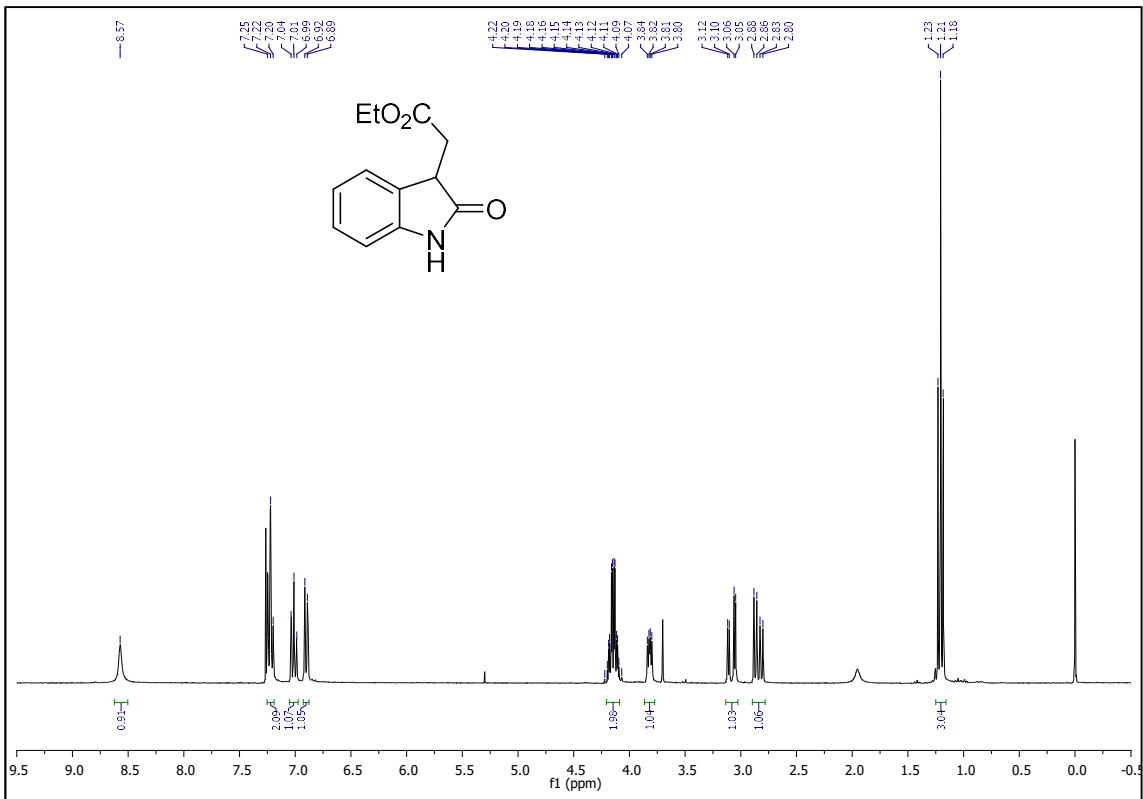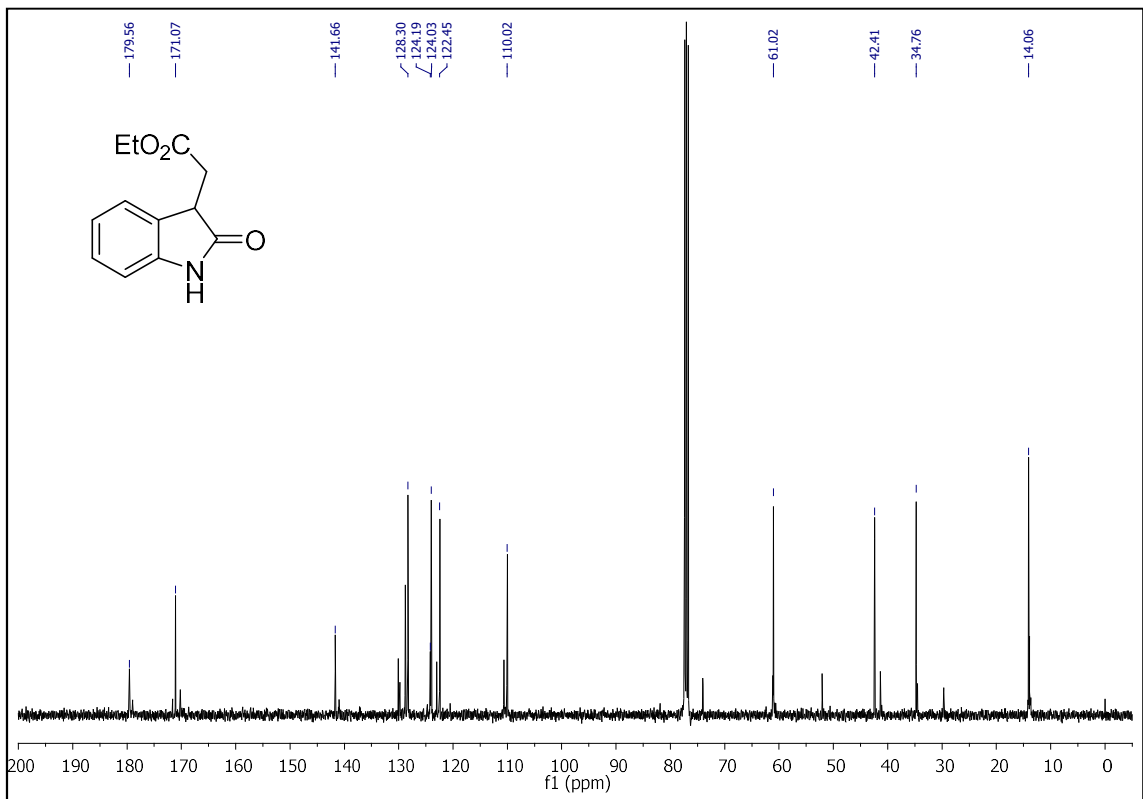

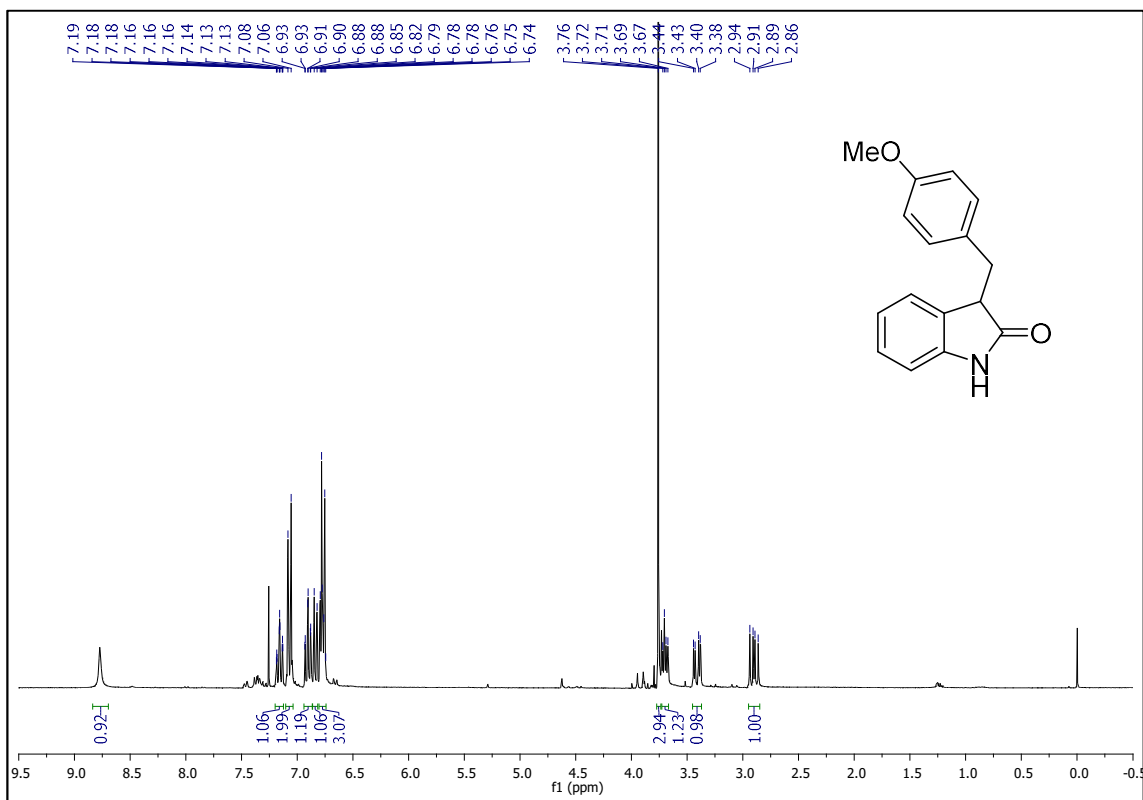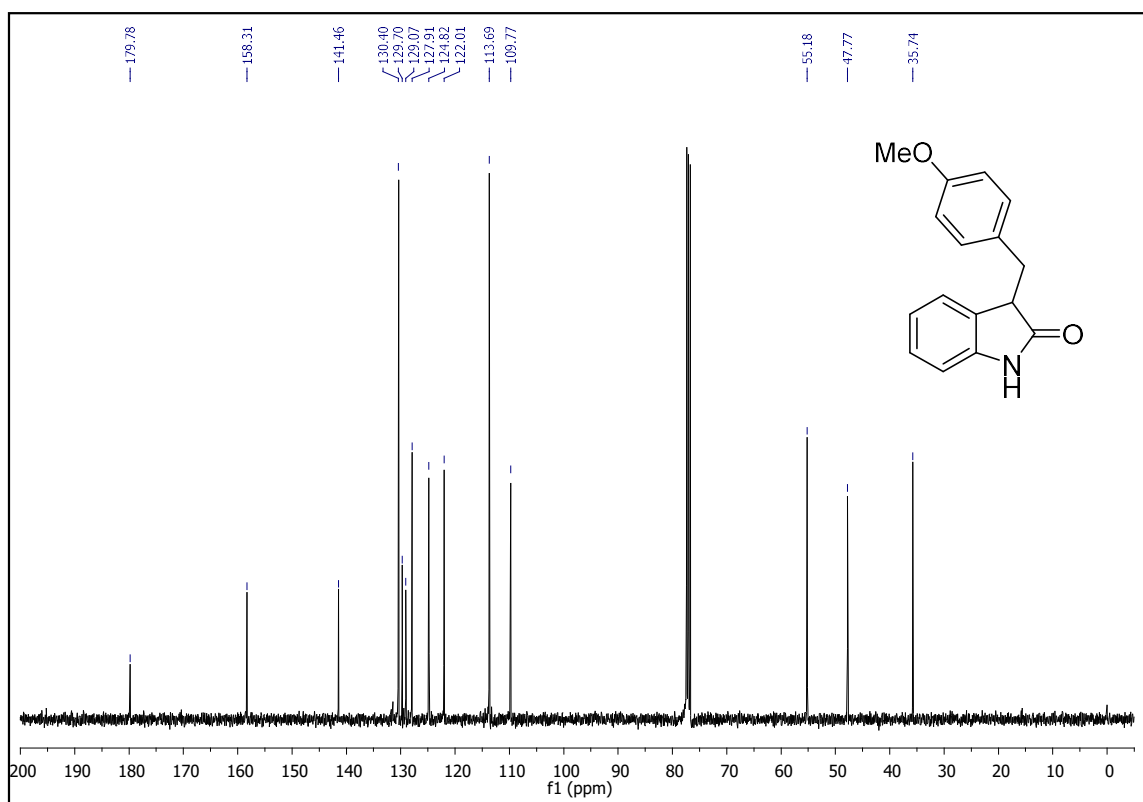

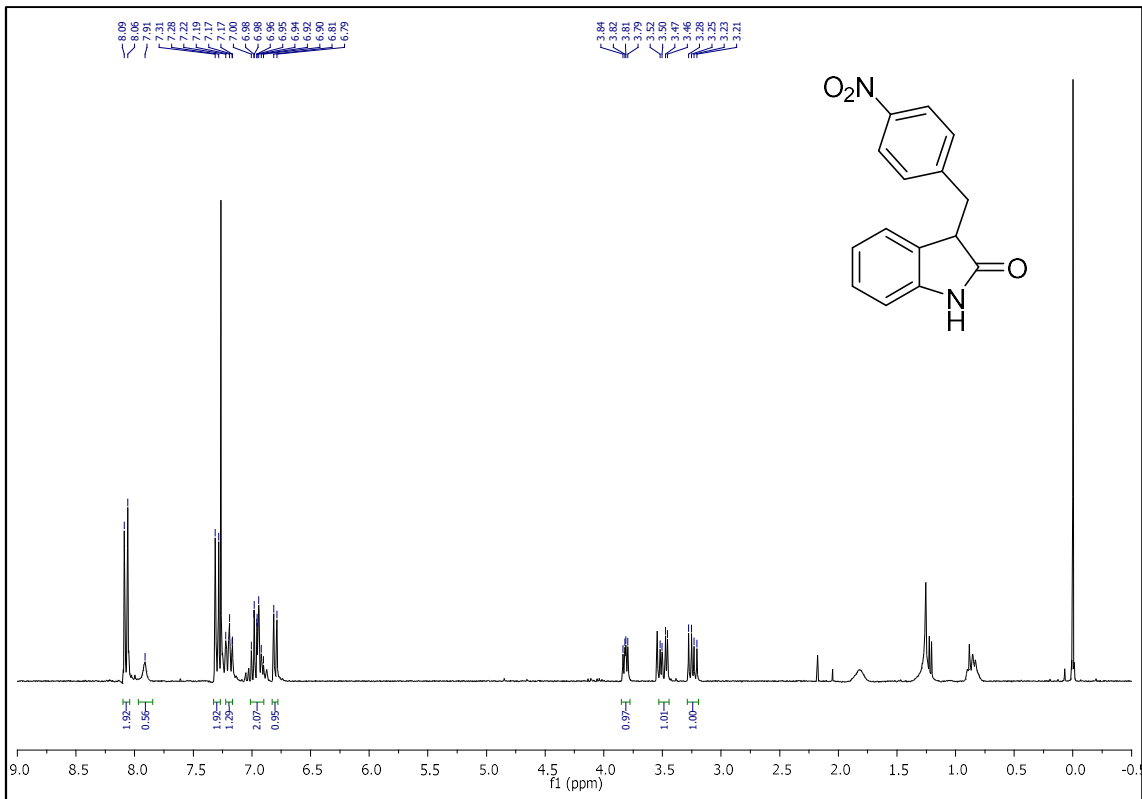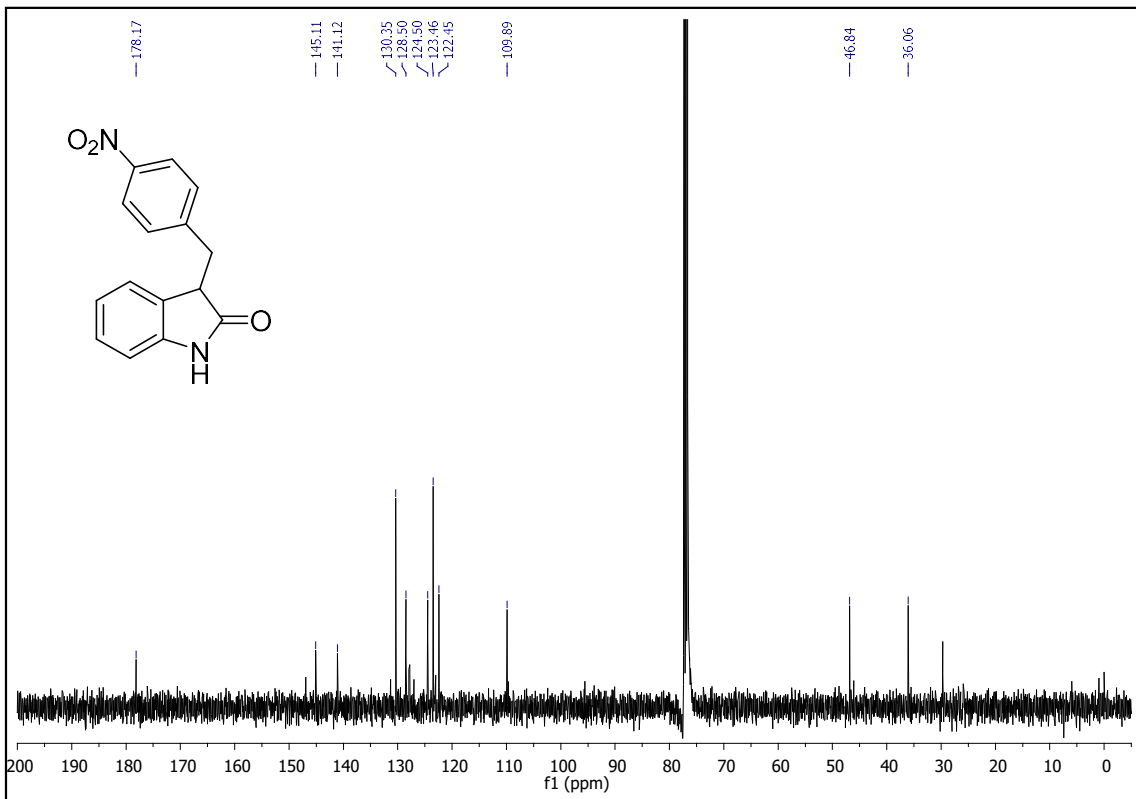

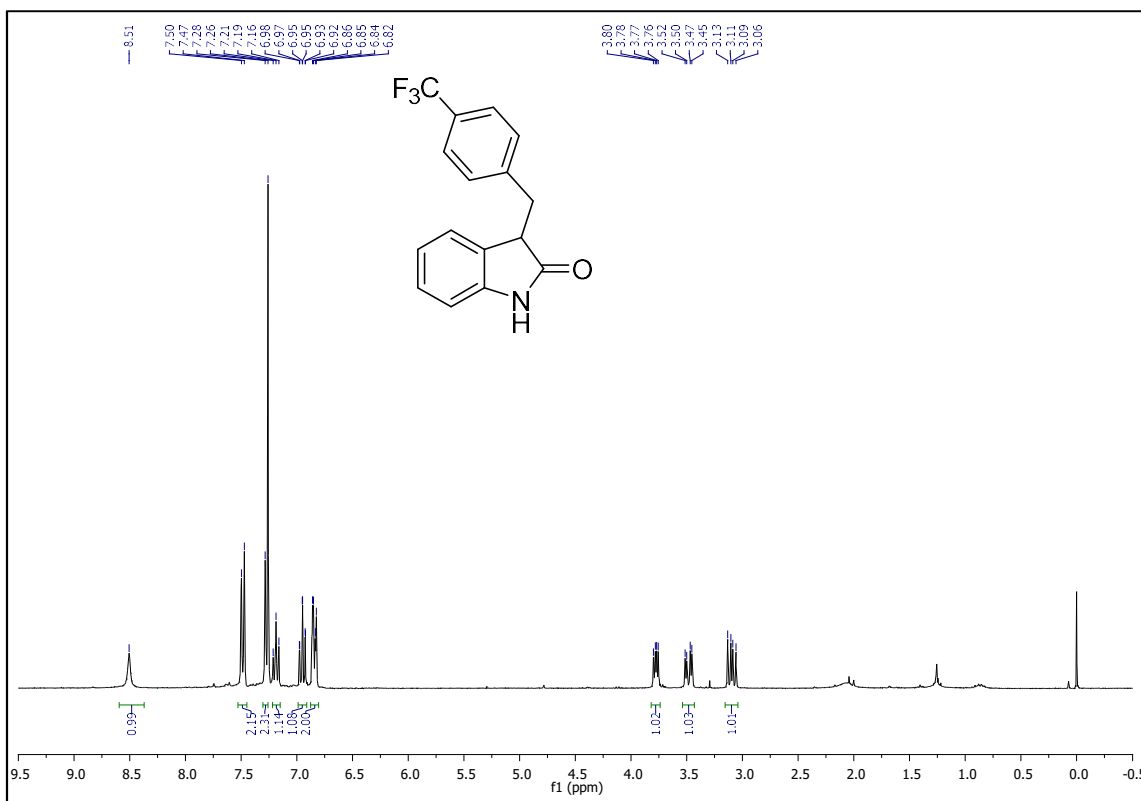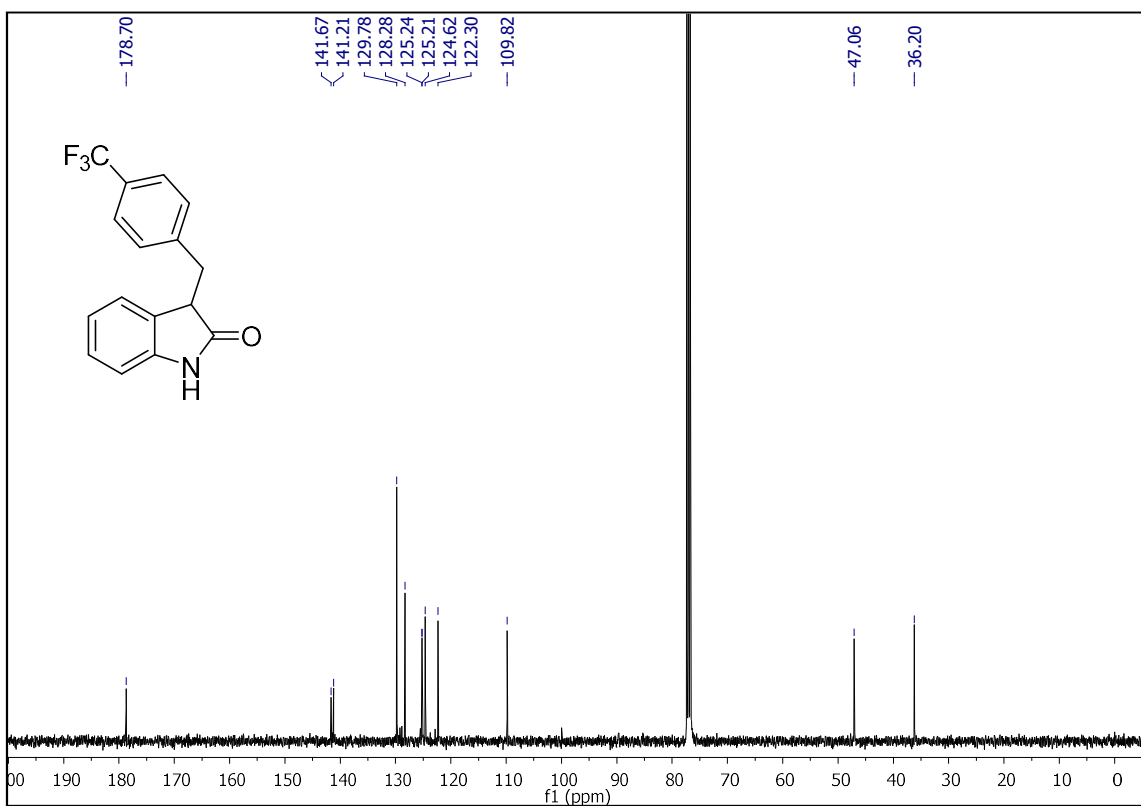

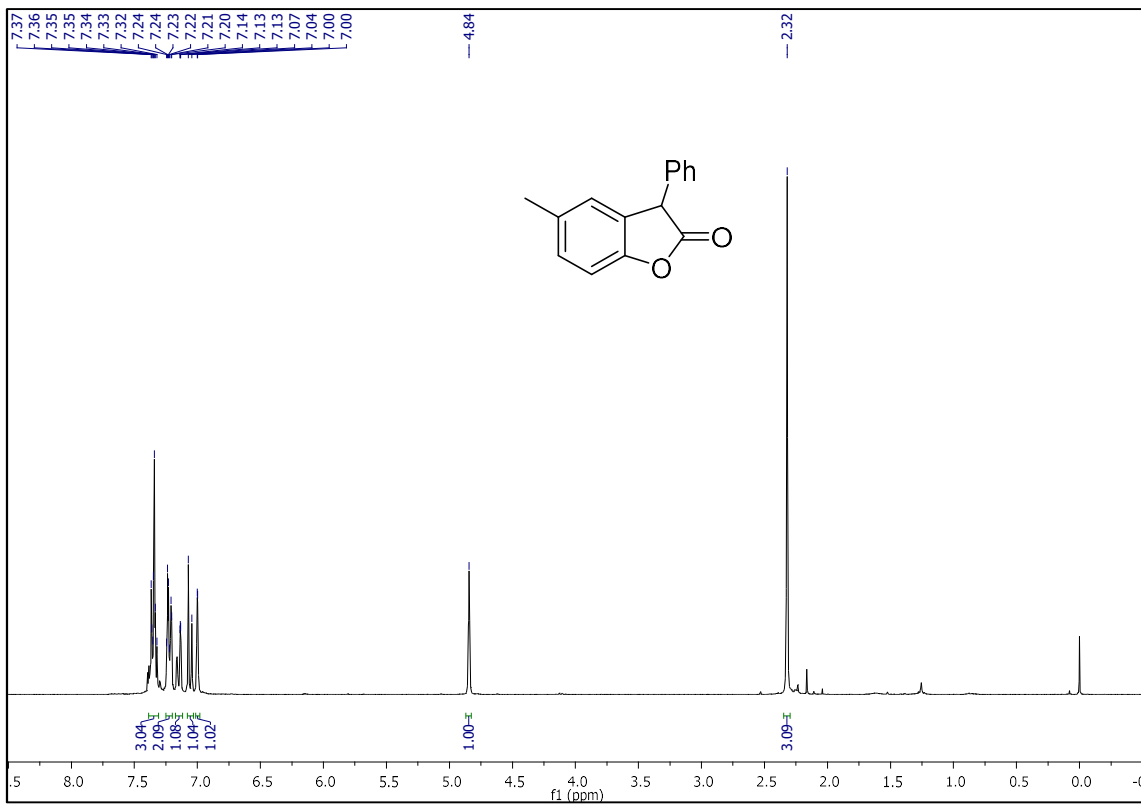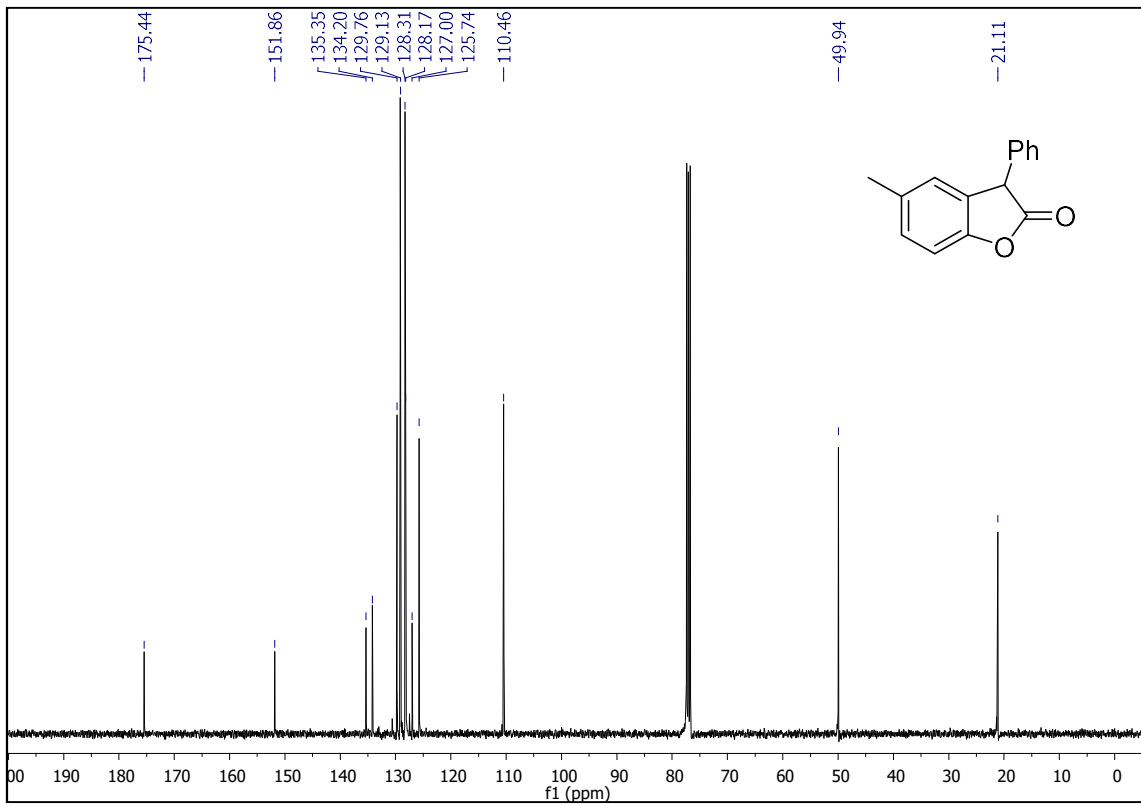

# NMR SPECTRA OF AMINATION PRODUCTS

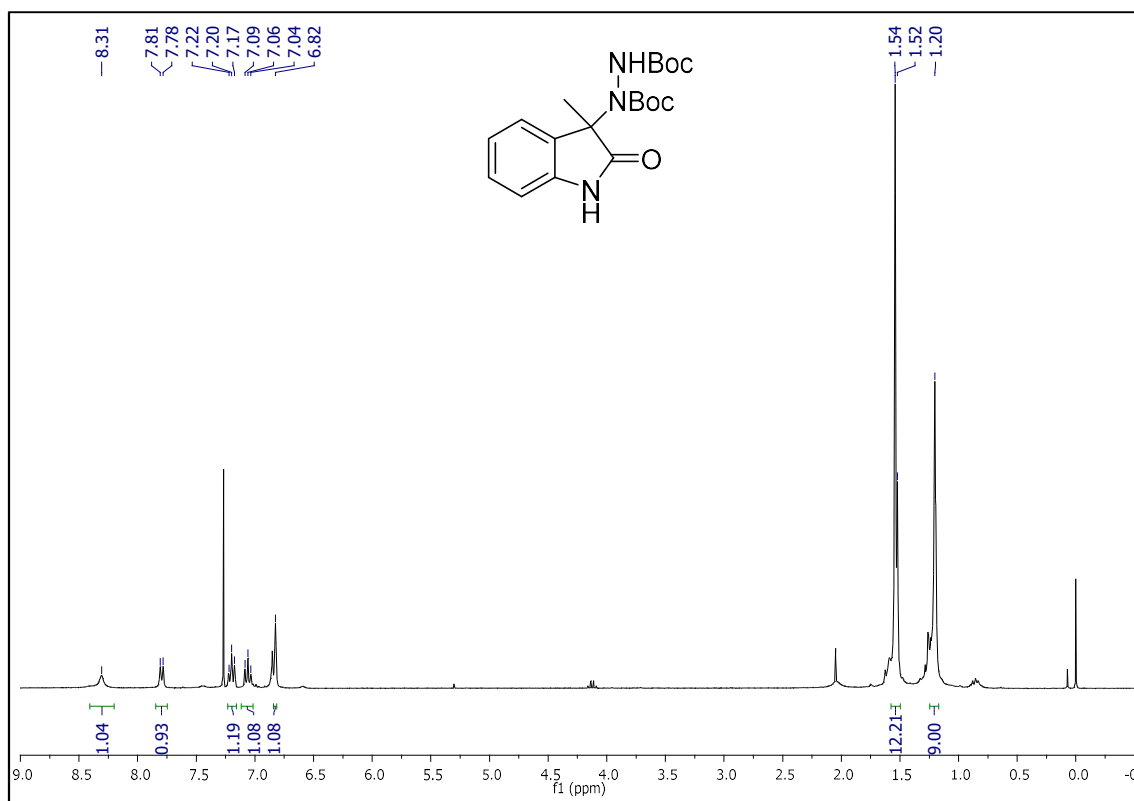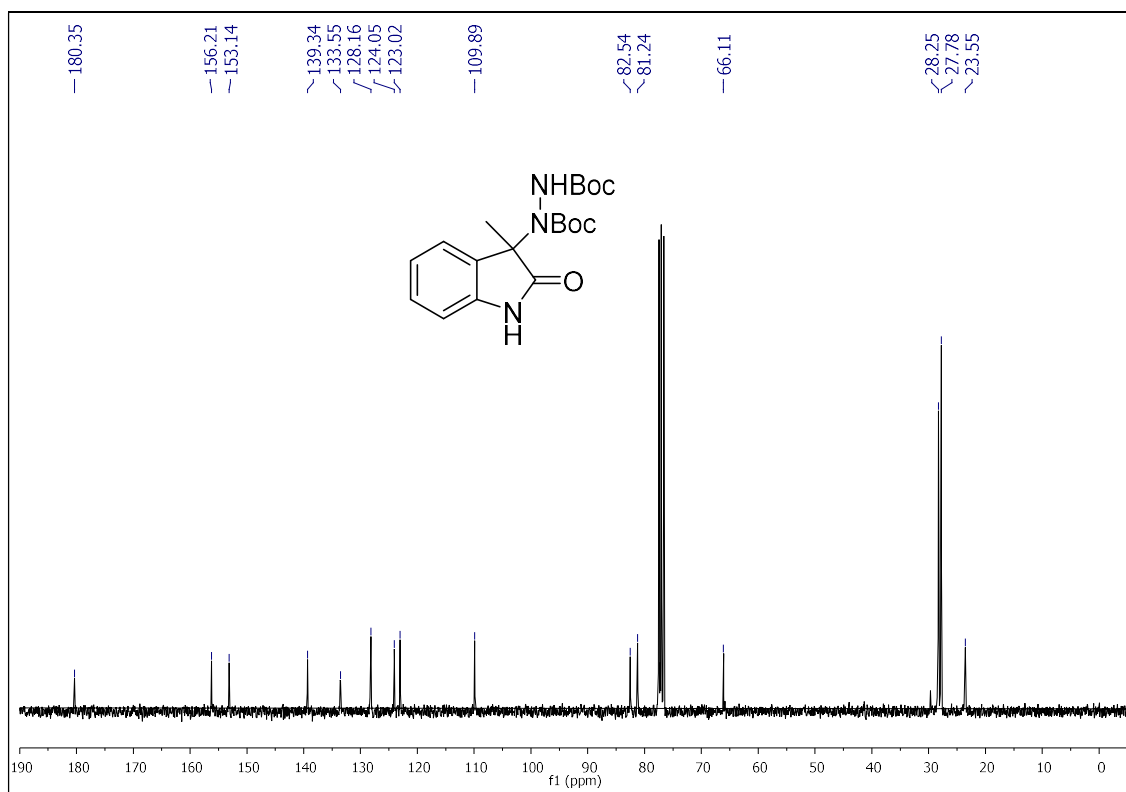



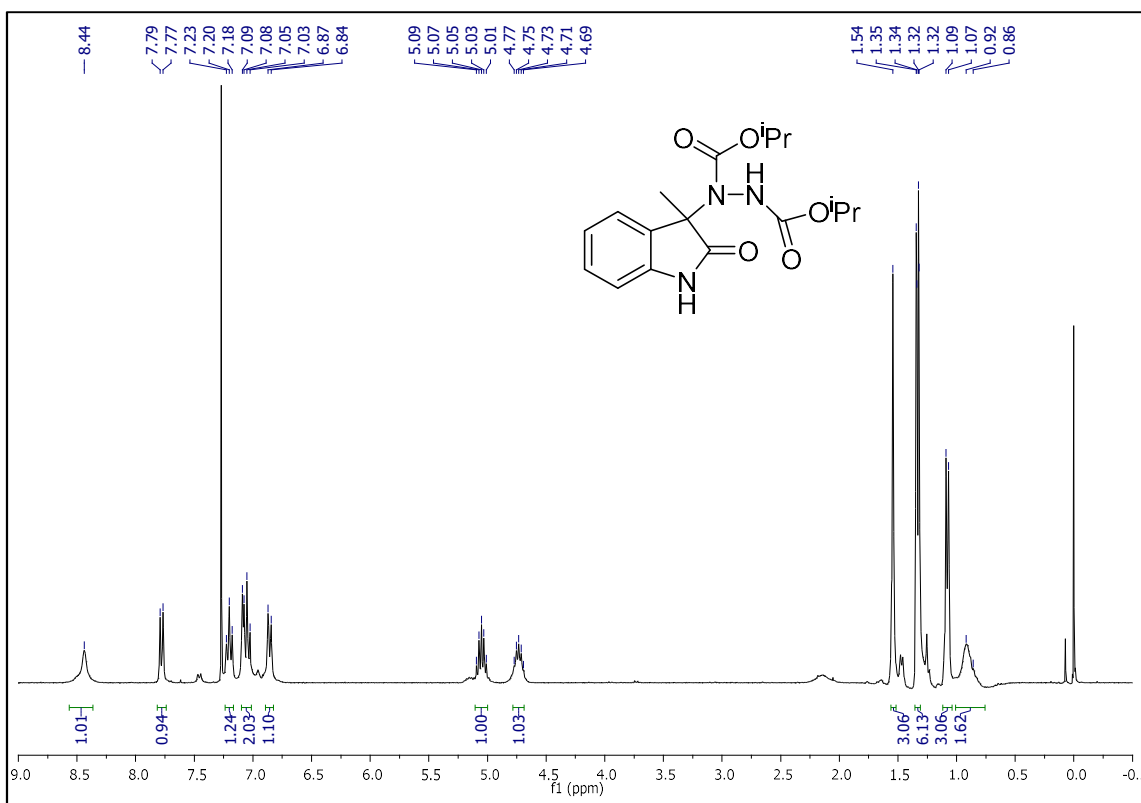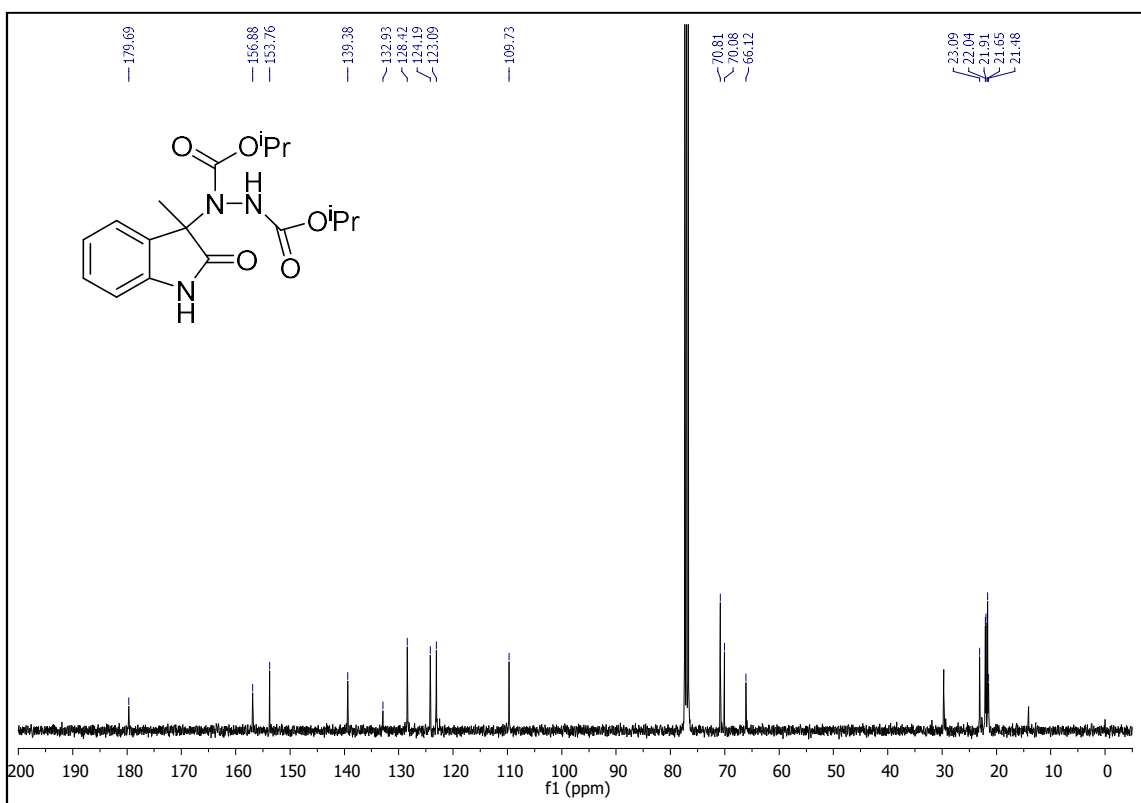

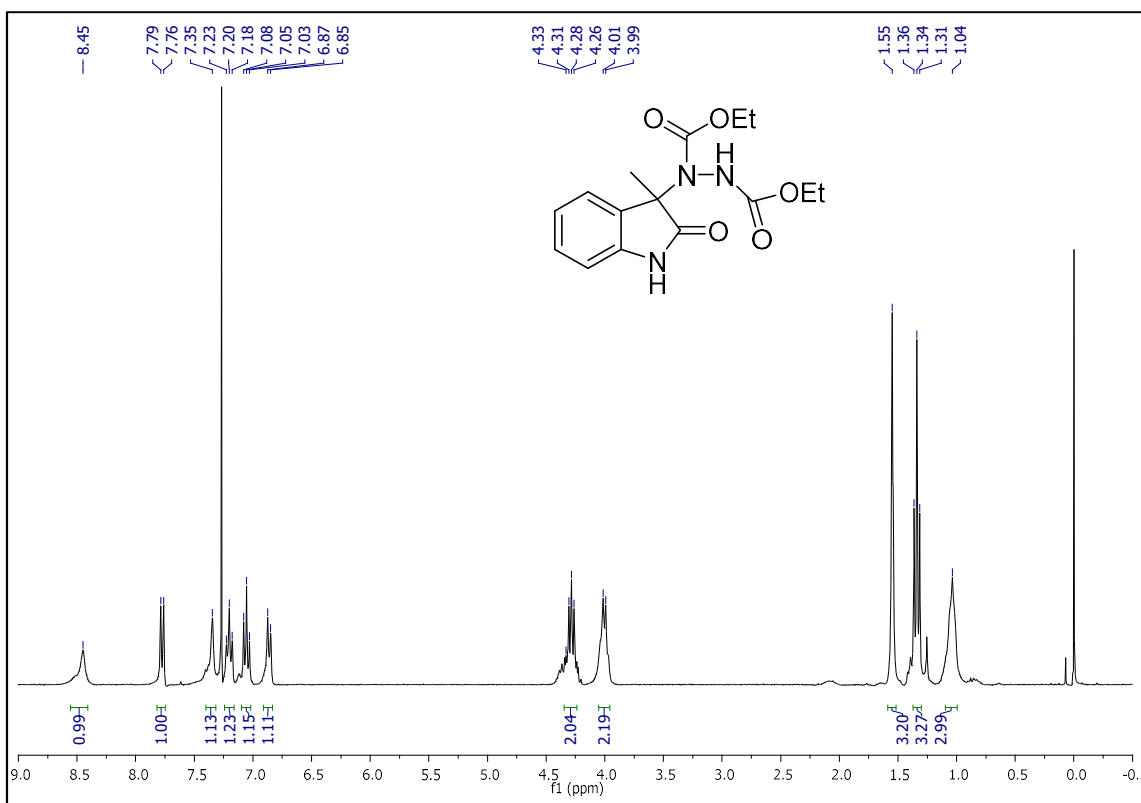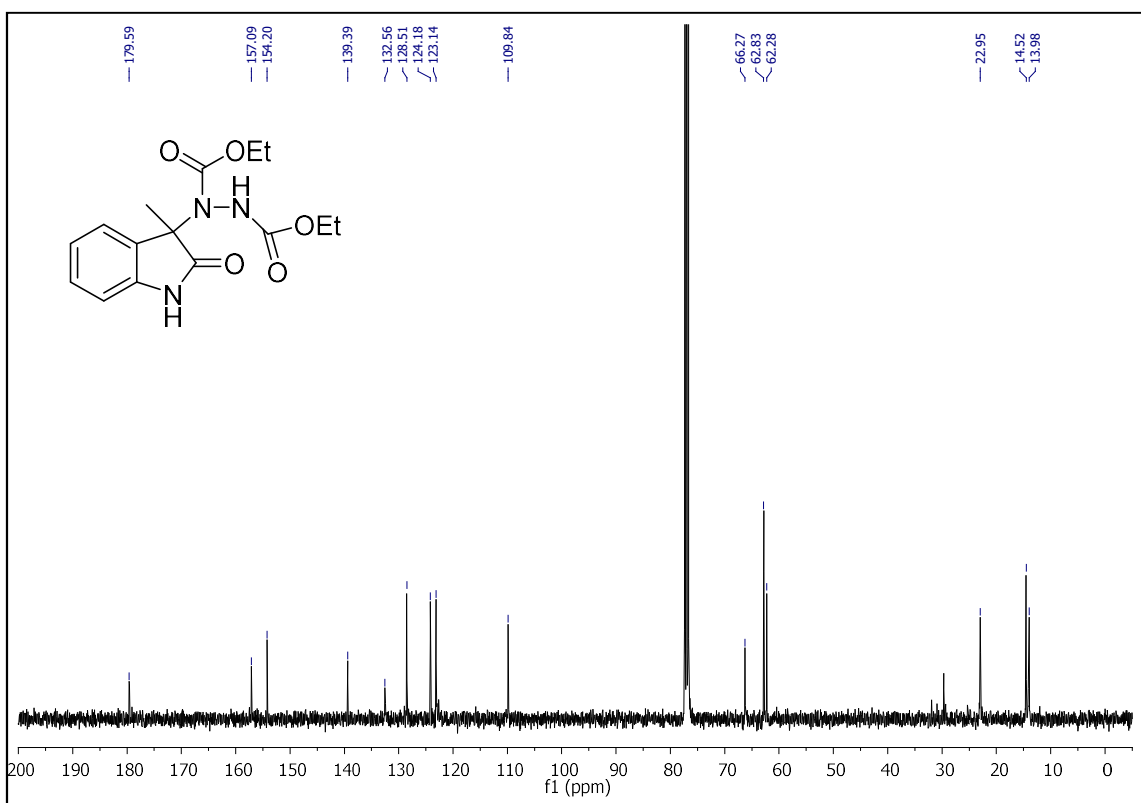

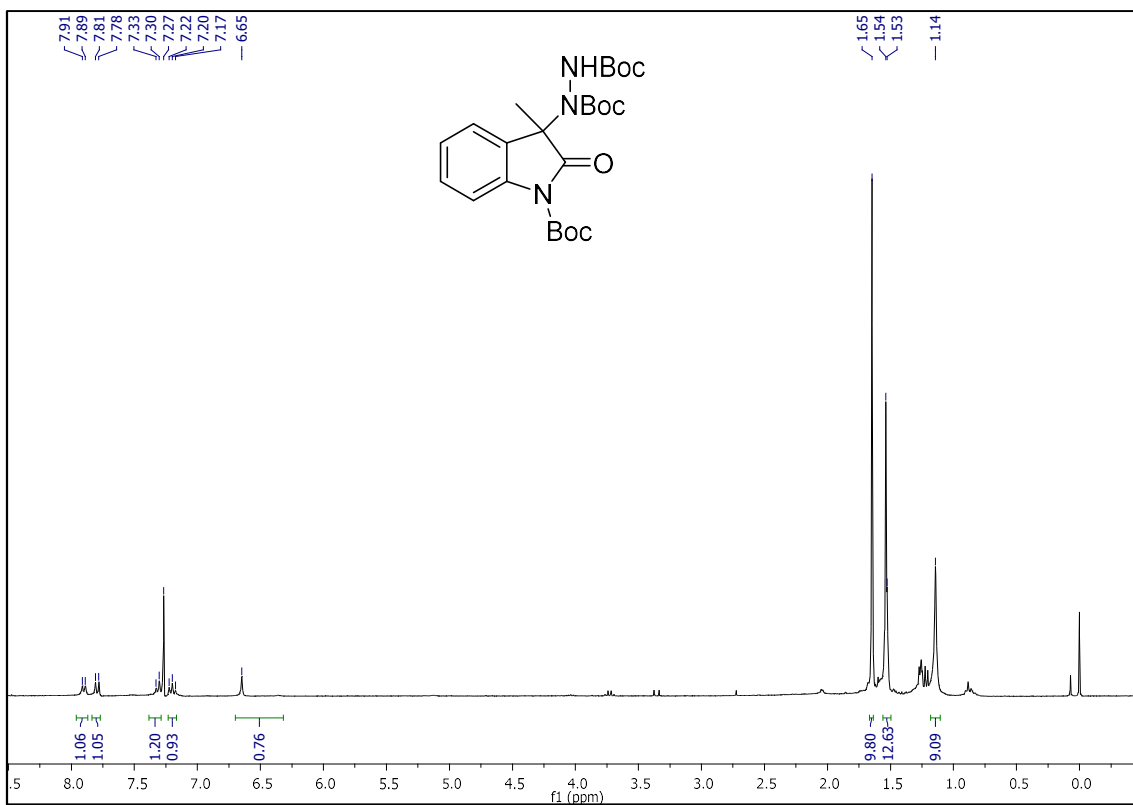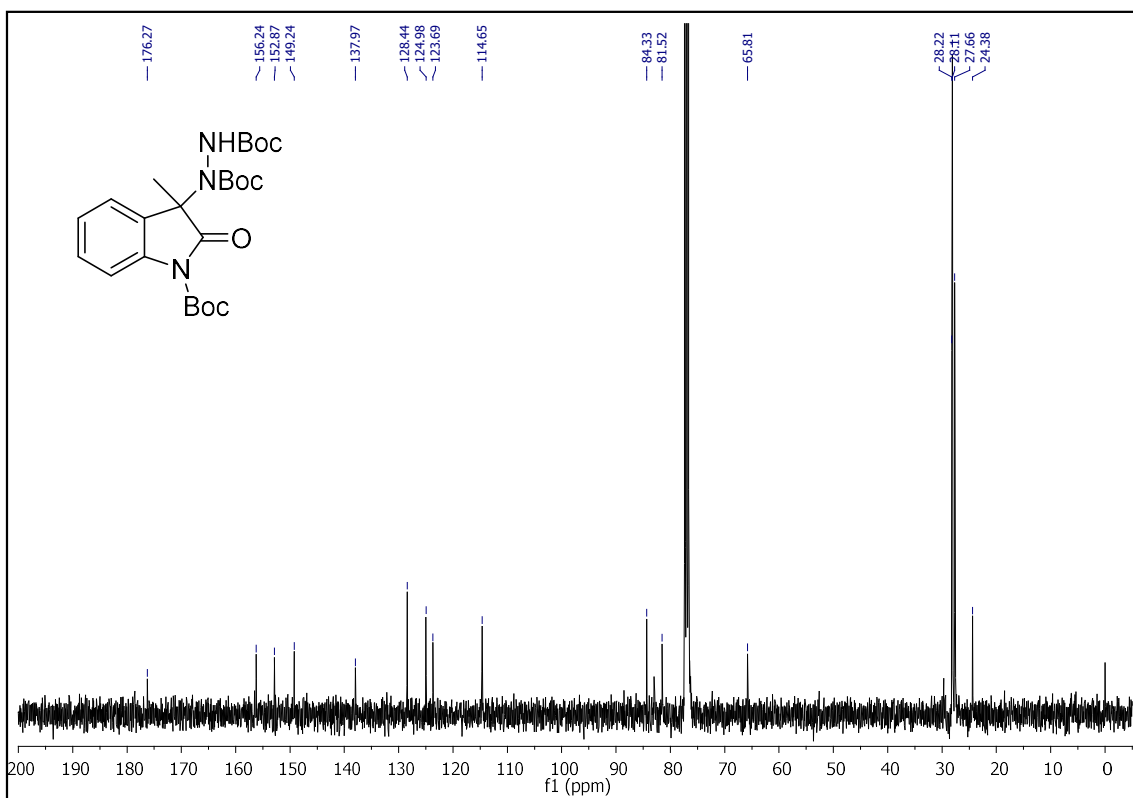

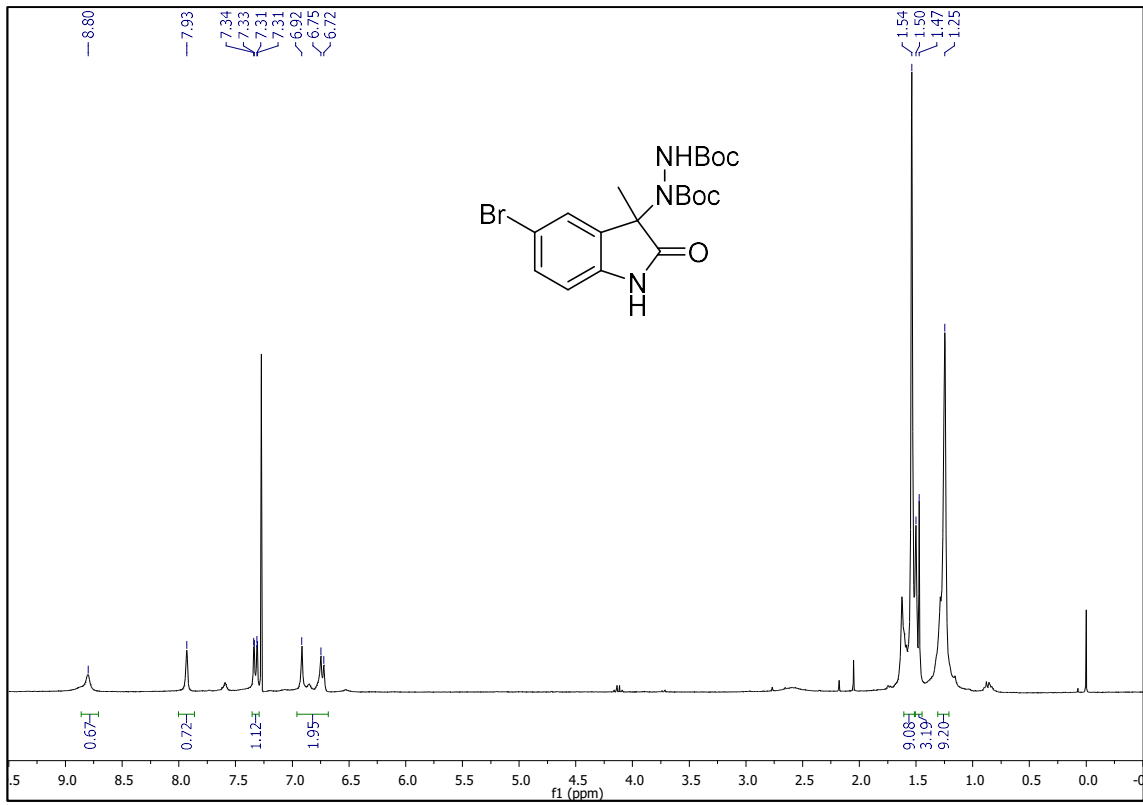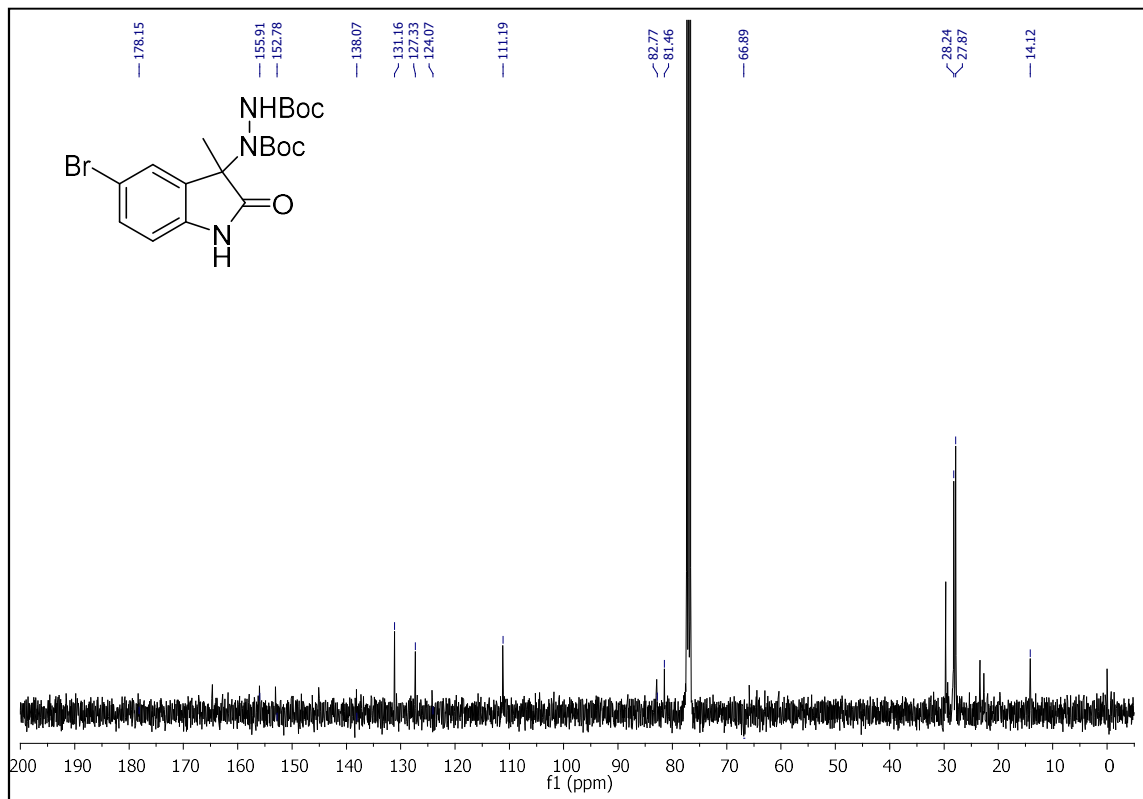

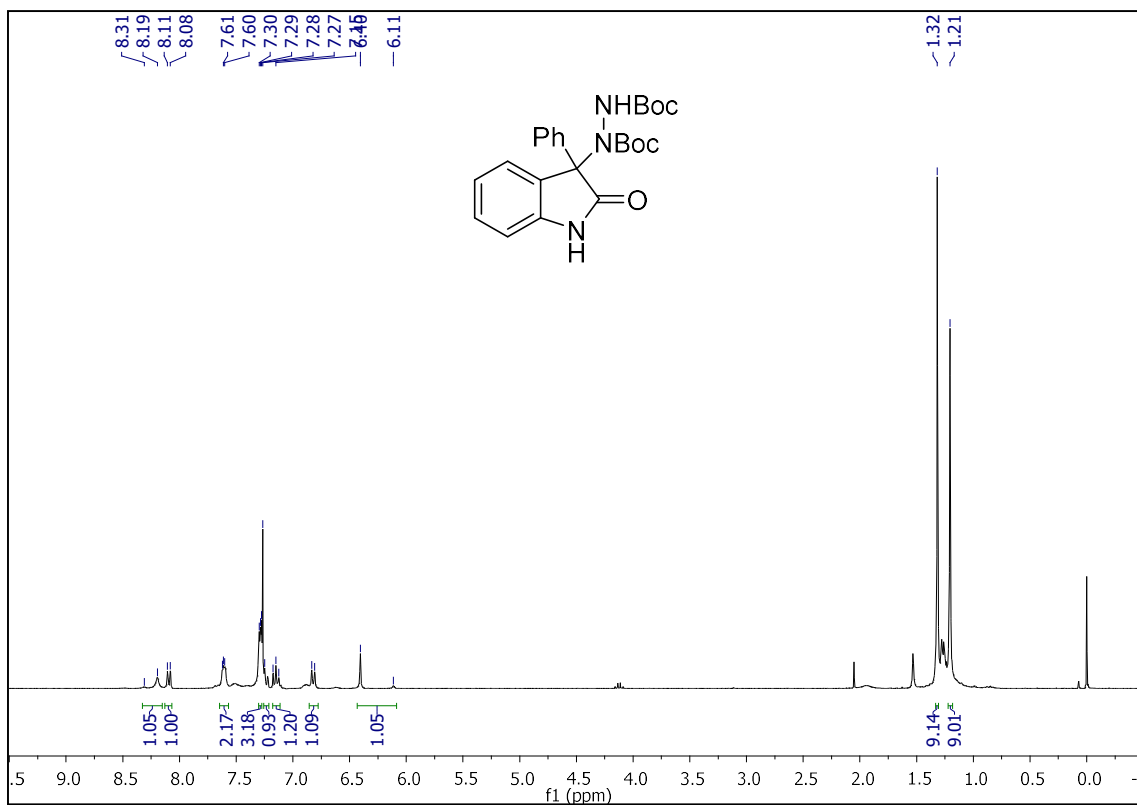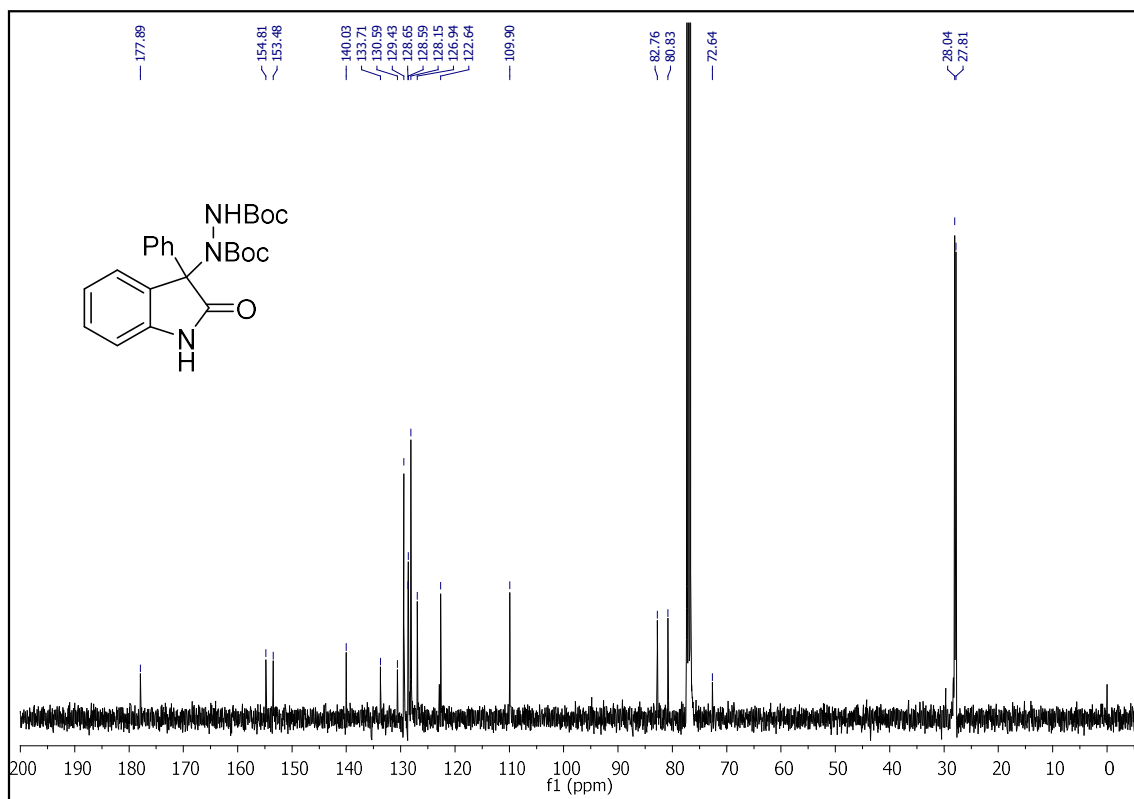

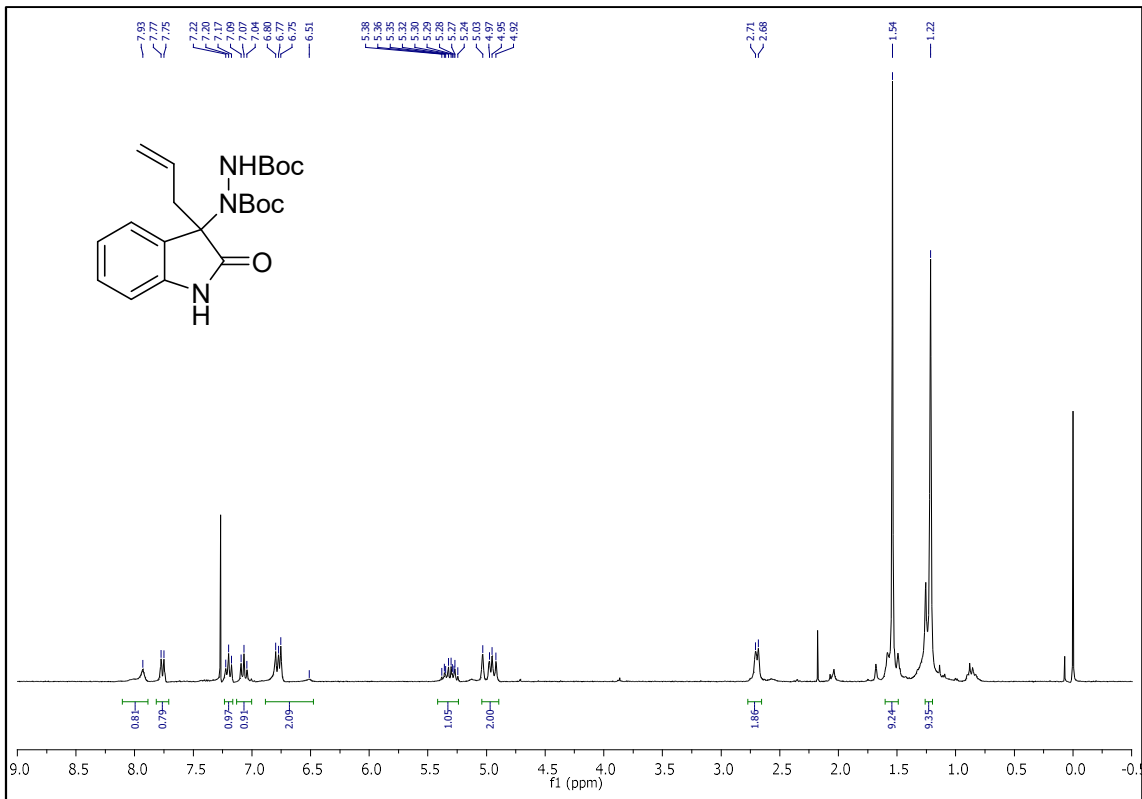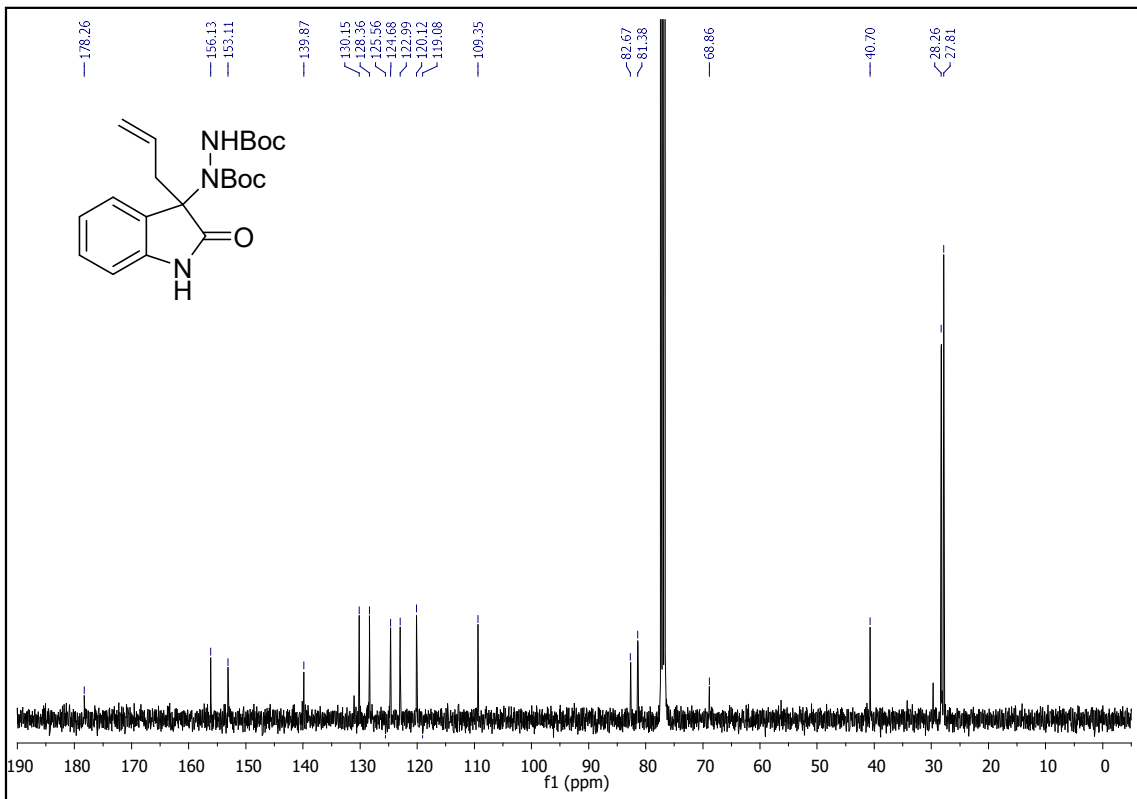

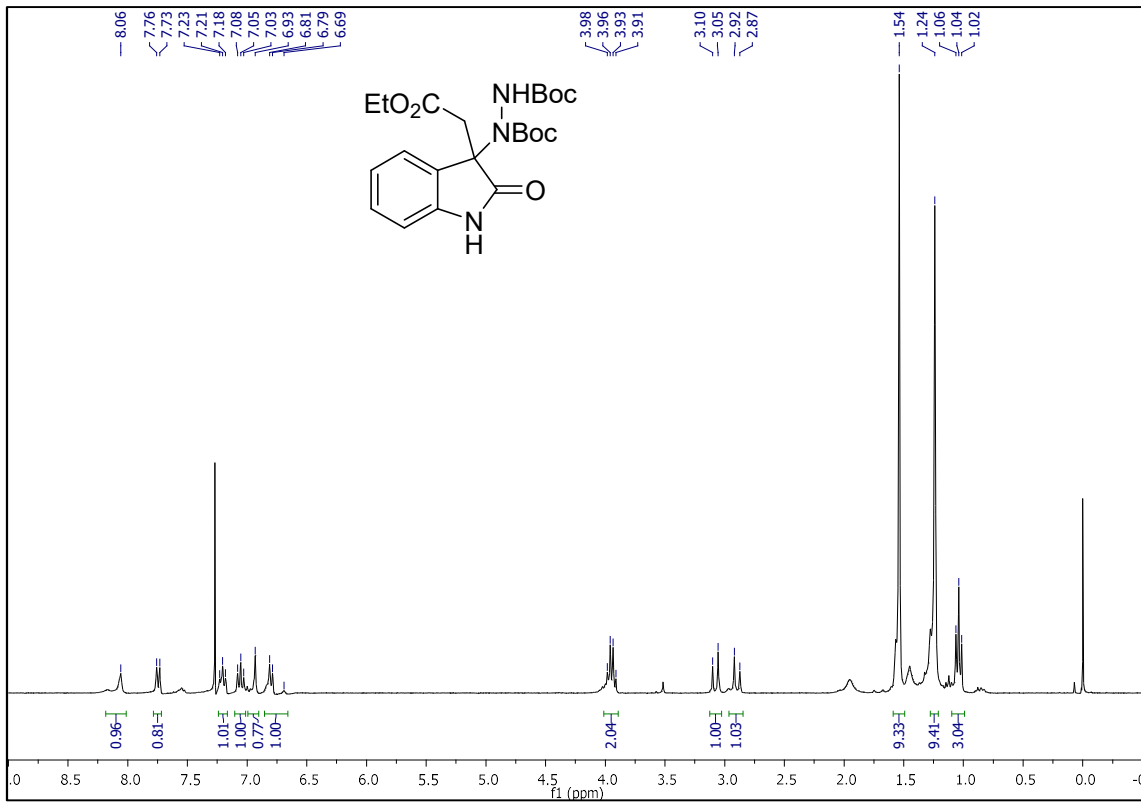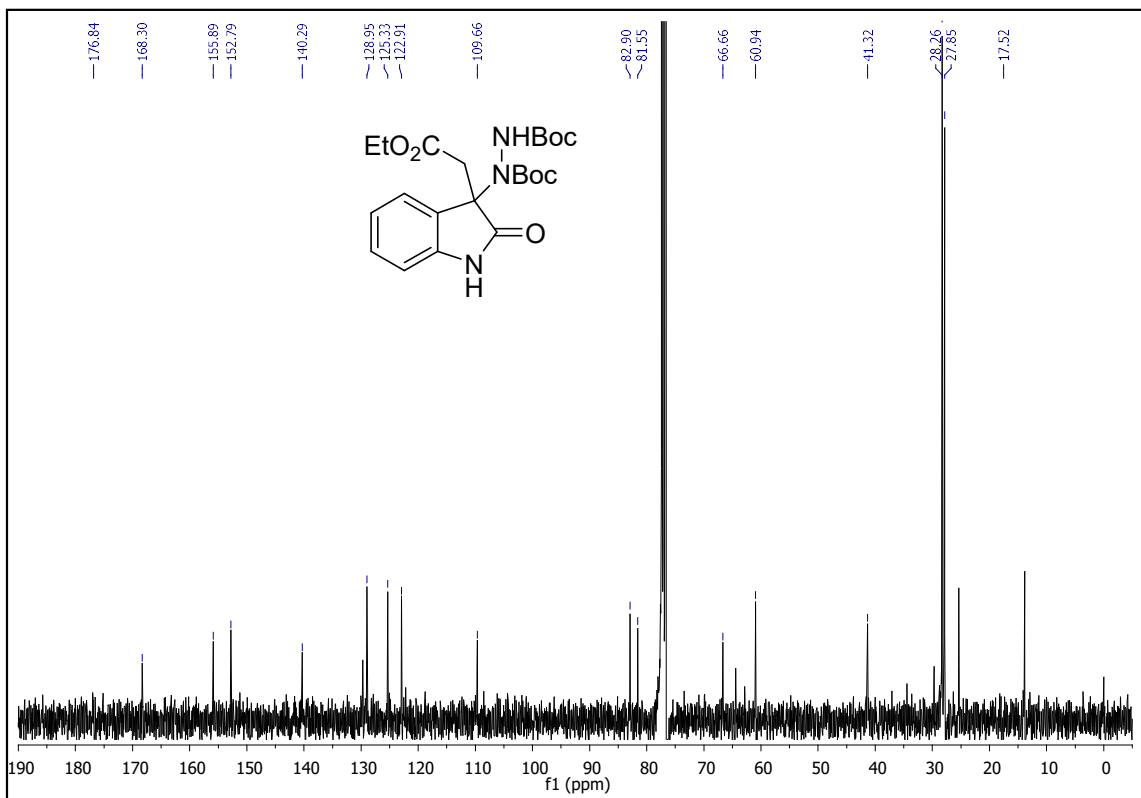

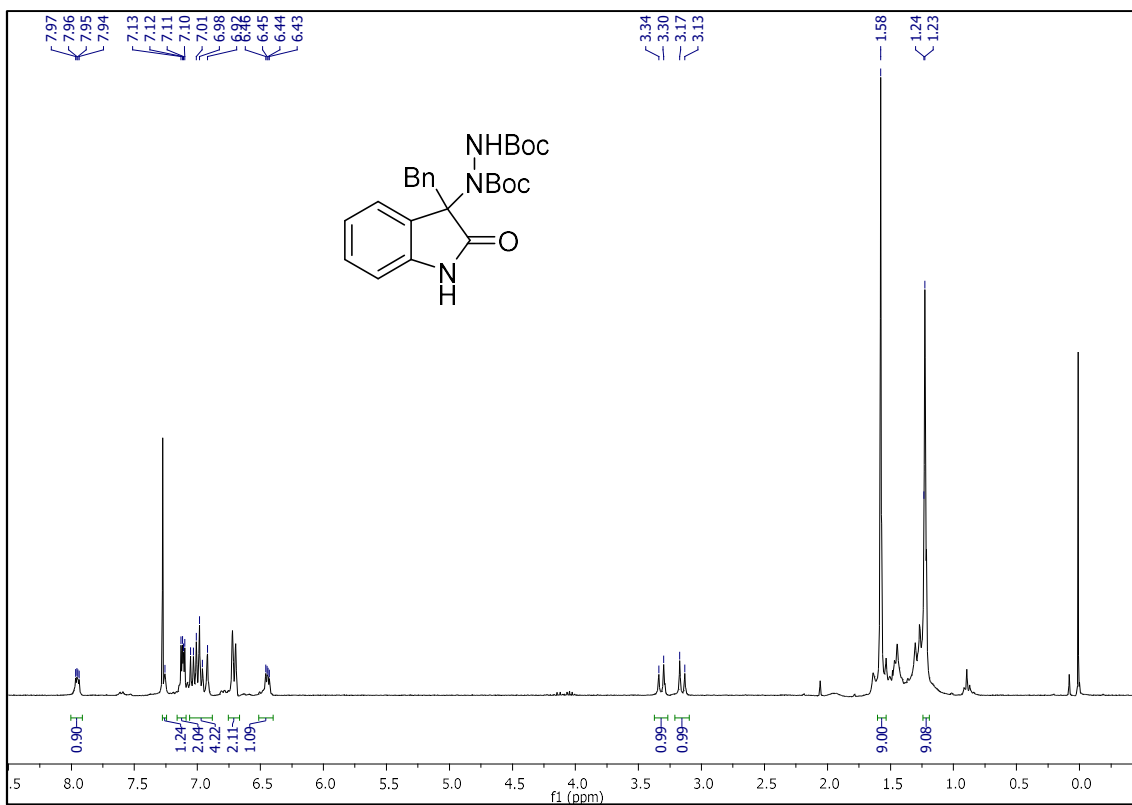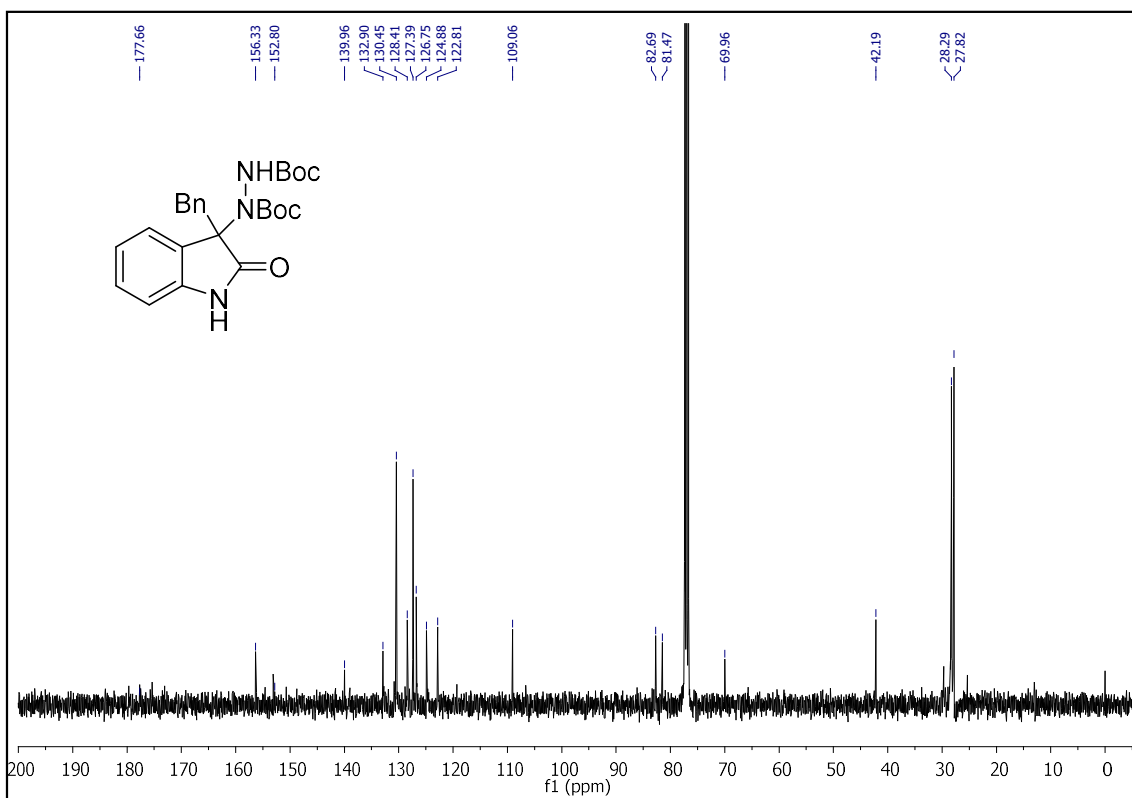



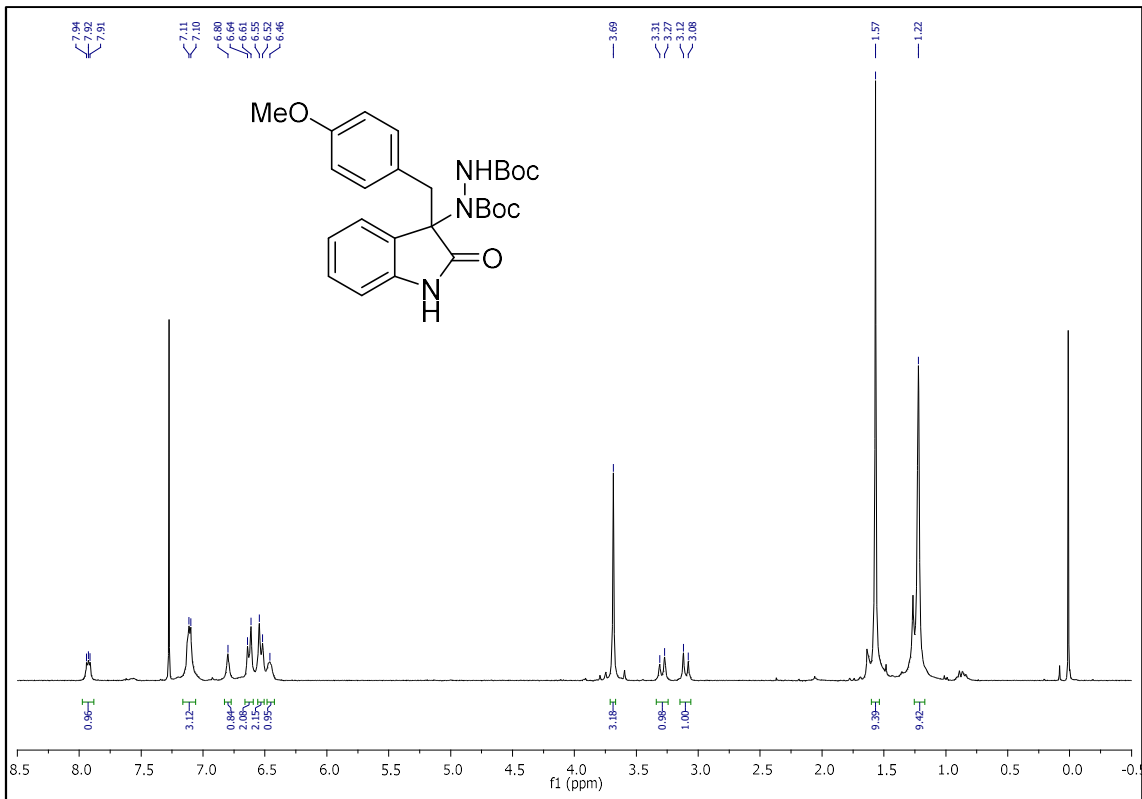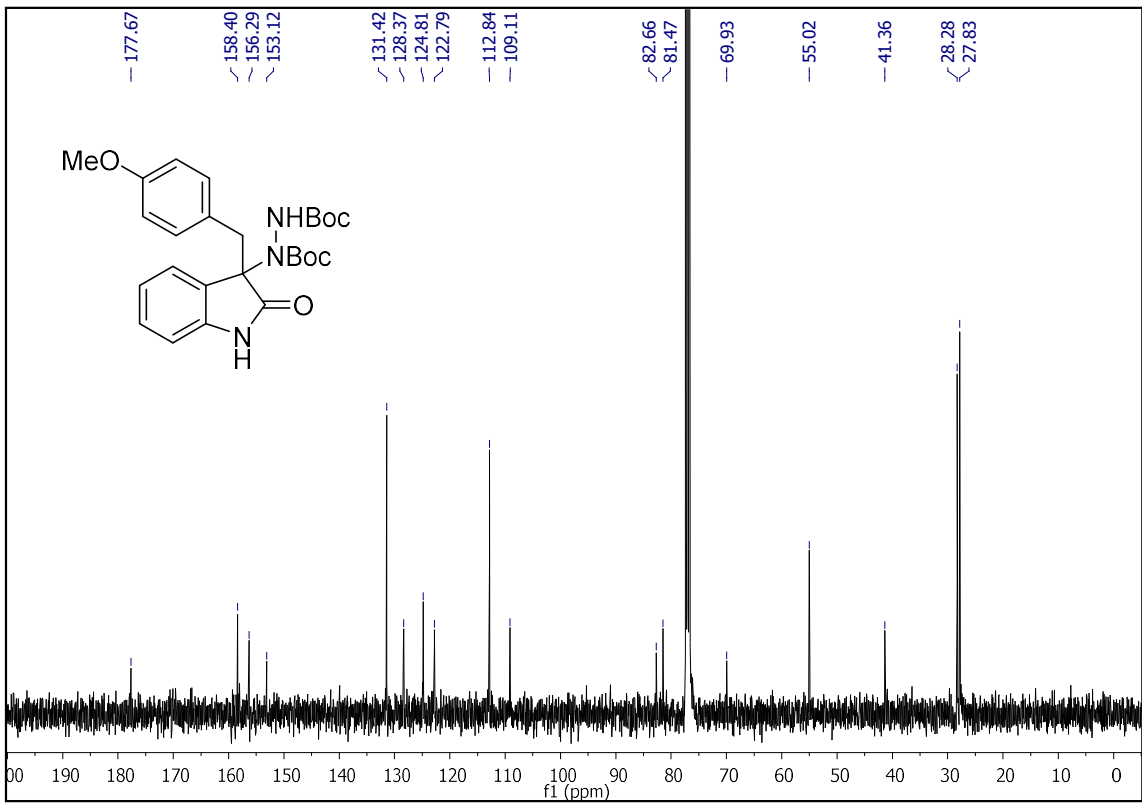

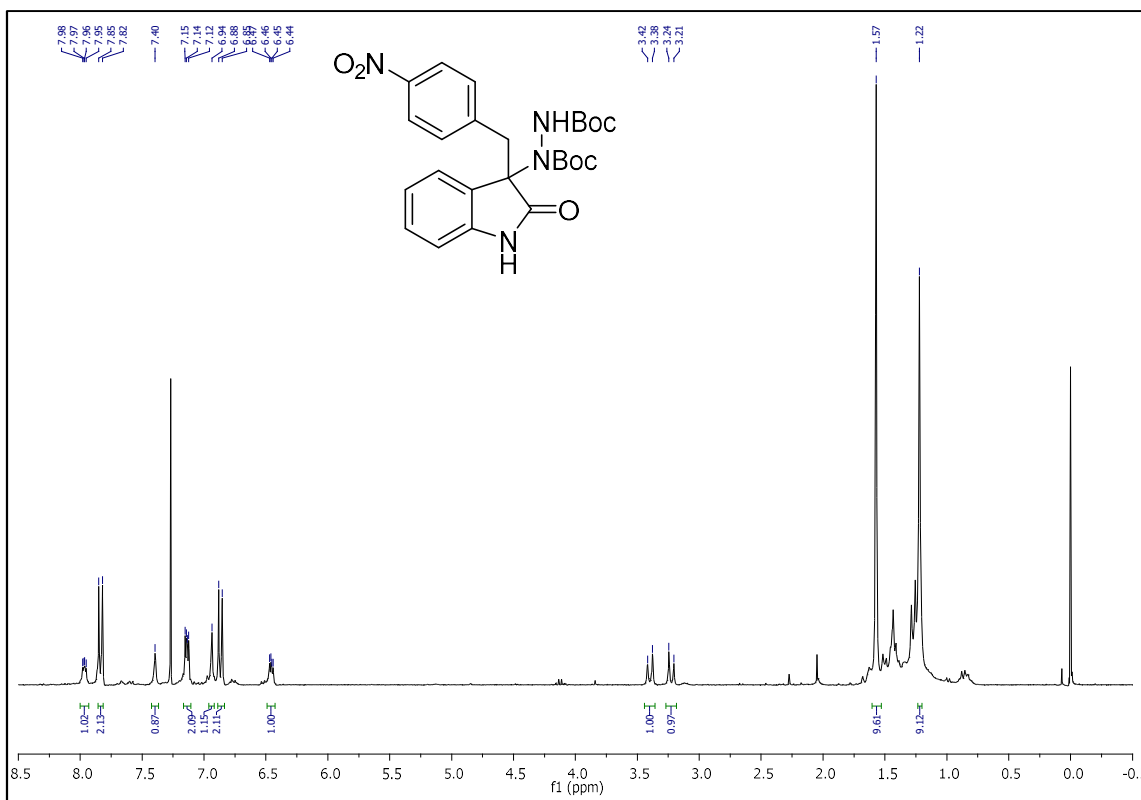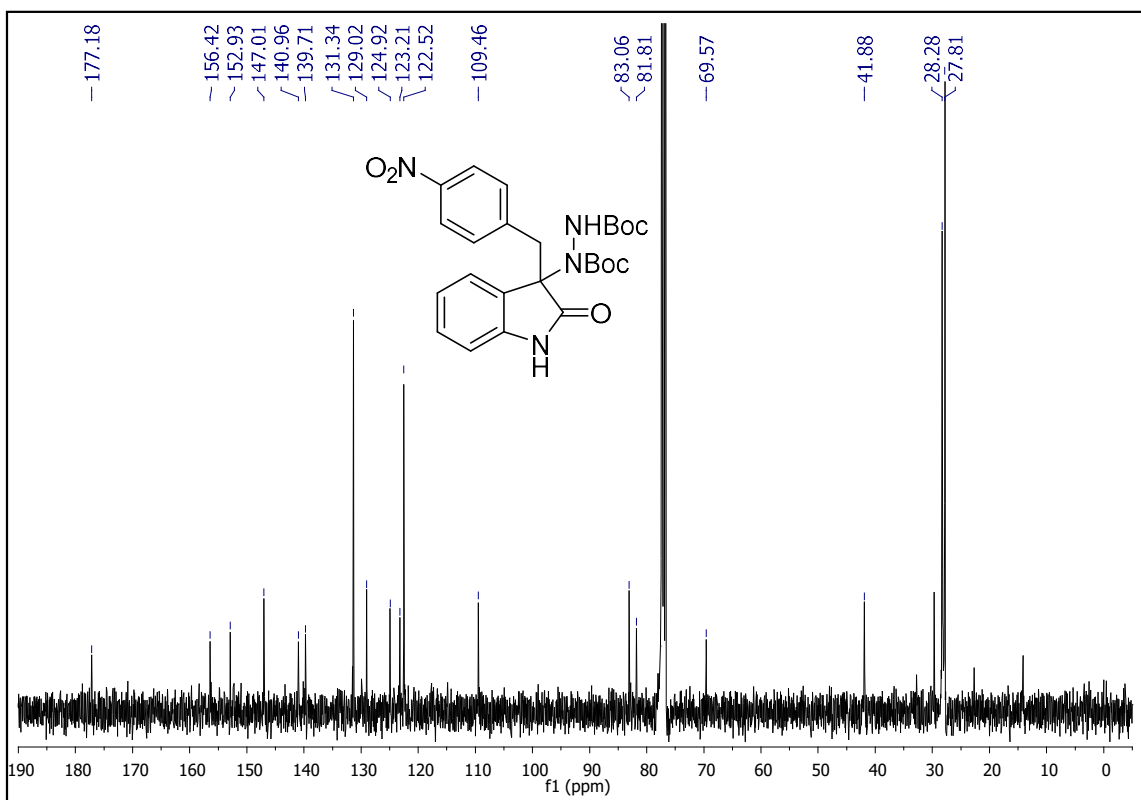

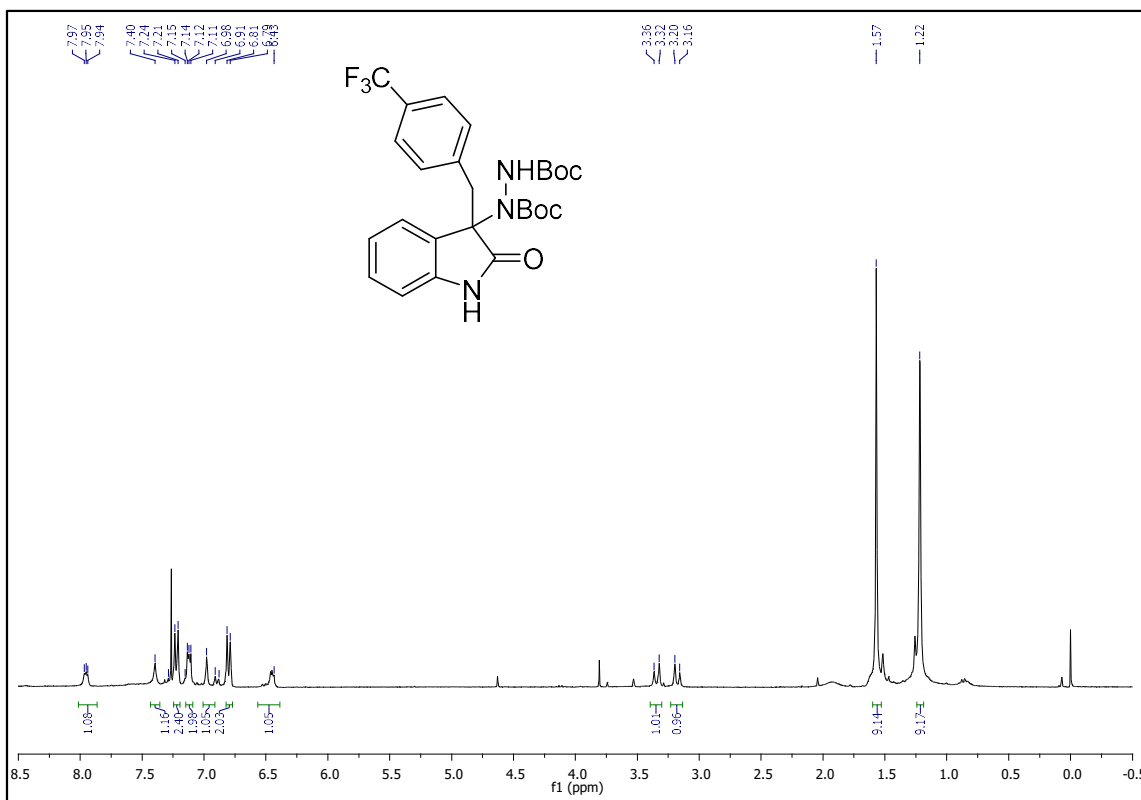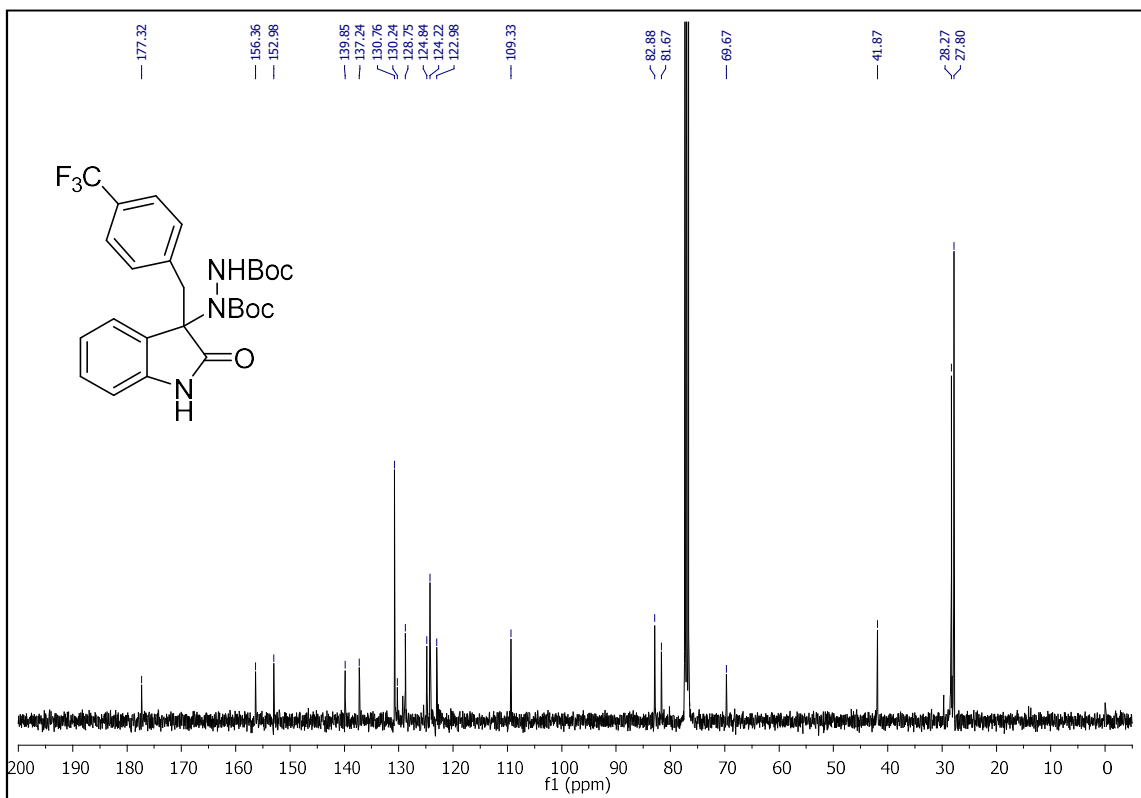

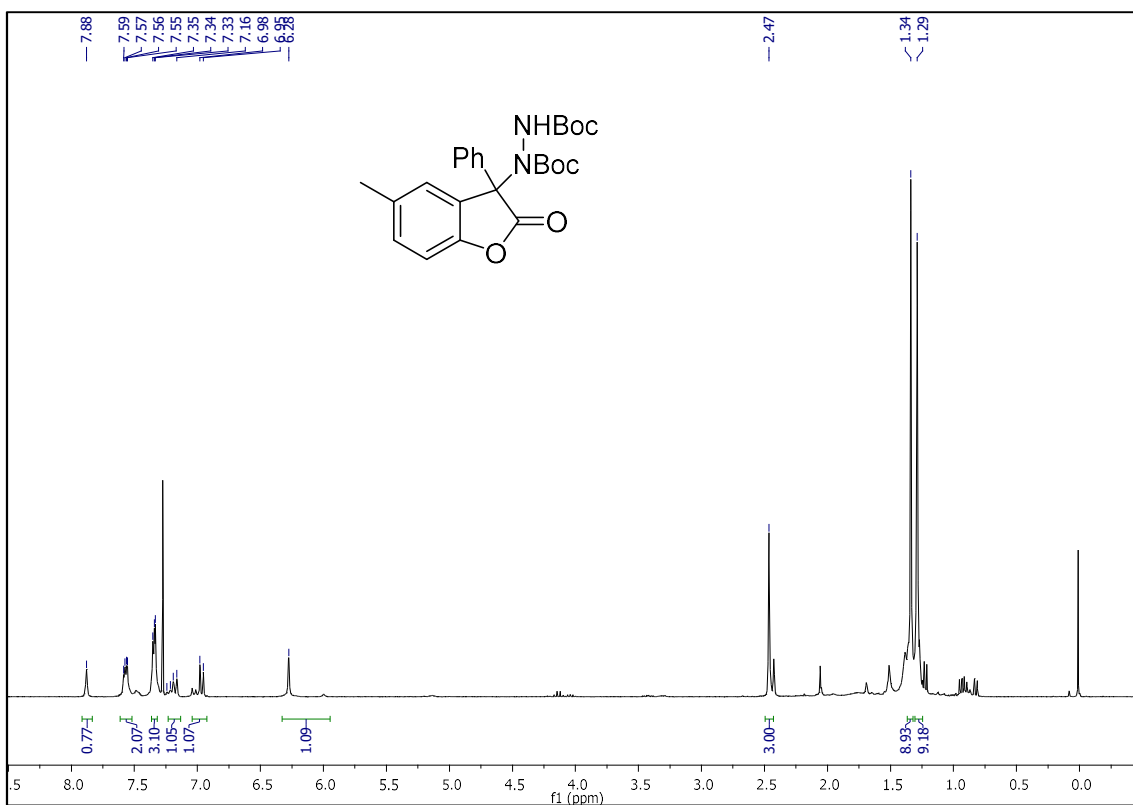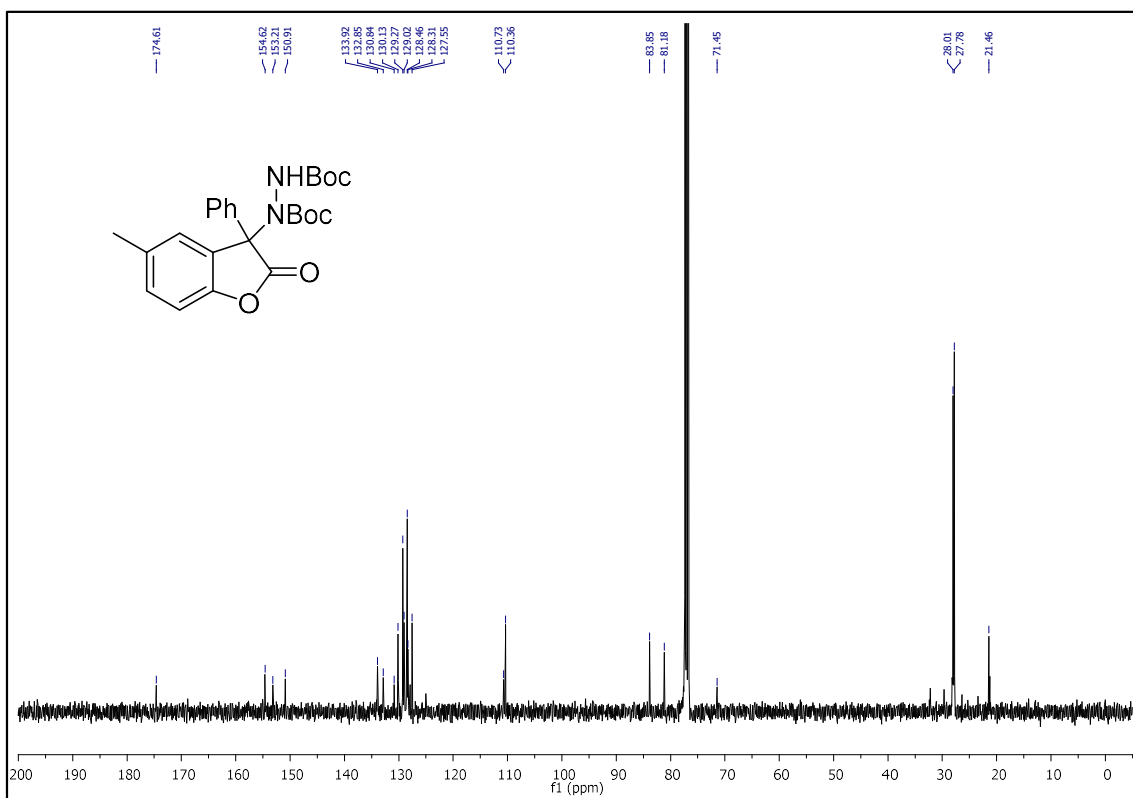

## HPLC CHROMATOGRAM OF THE AMINATION PRODUCTS

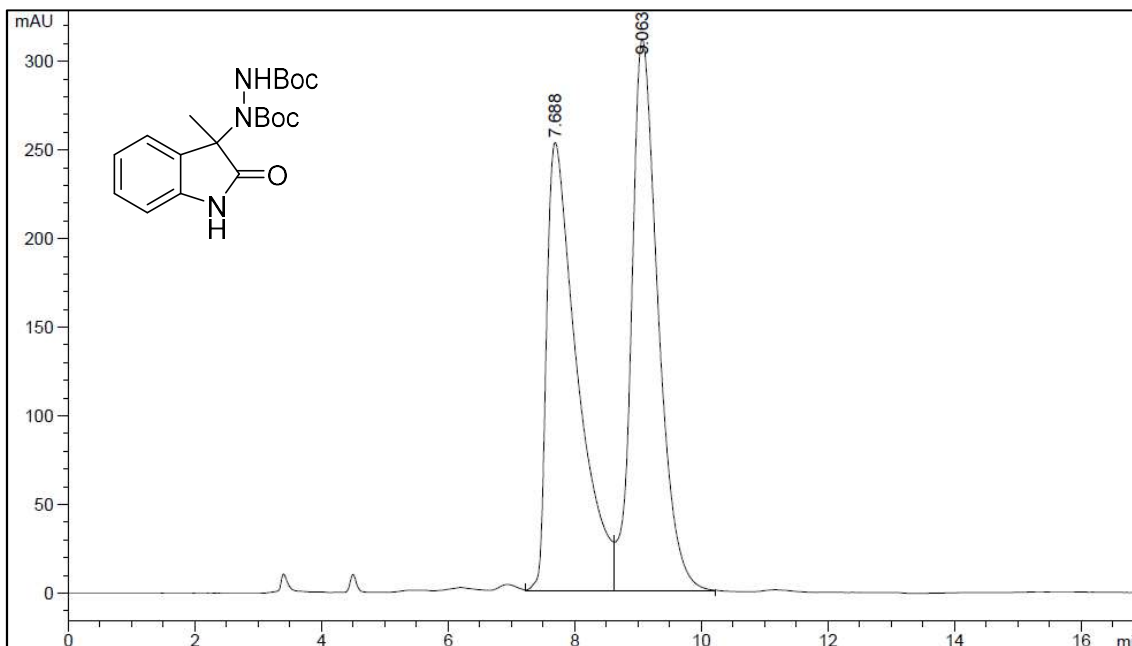

| Peak | Ret. Time (min) | Type | Width  | Area (mAU*s) | Height (mAU) | Area (%) |
|------|-----------------|------|--------|--------------|--------------|----------|
| 1    | 7.688           | VV   | 0.4929 | 8478.5654    | 253.0273     | 48.3234  |
| 2    | 9.063           | VB   | 0.4416 | 9066.8945    | 311.4492     | 51.6766  |

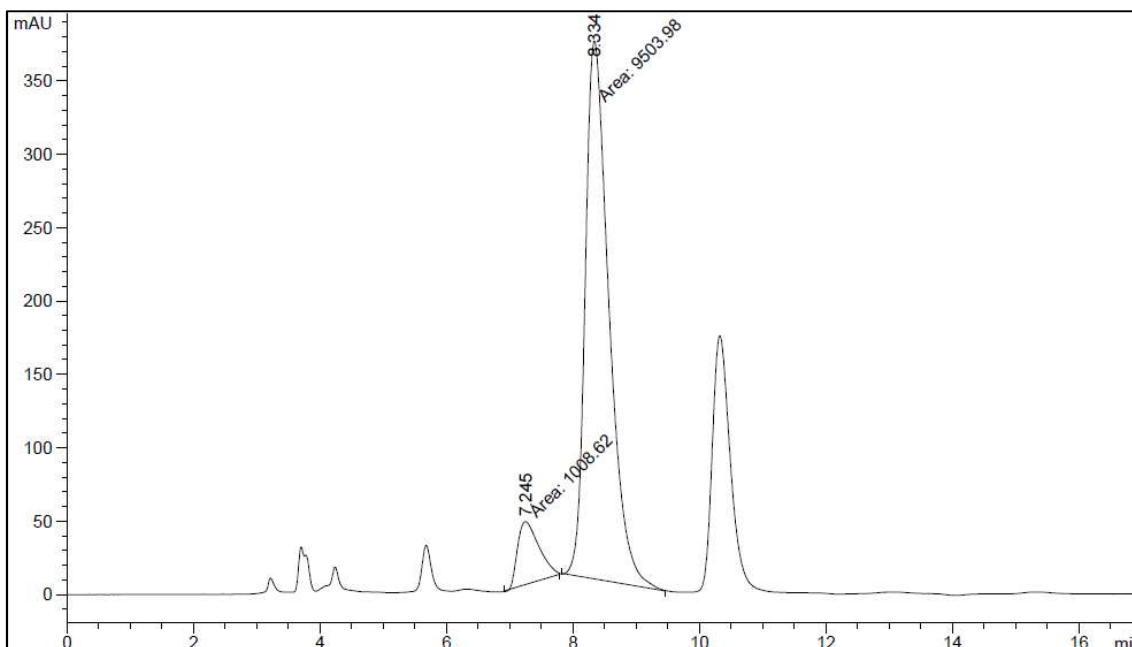

| Peak | Ret. Time (min) | Type | Width  | Area (mAU*s) | Height (mAU) | Area (%) |
|------|-----------------|------|--------|--------------|--------------|----------|
| 1    | 7.245           | MM   | 0.3905 | 1008.6191    | 43.0523      | 9.5944   |
| 2    | 8.334           | MM   | 0.4321 | 9503.9466    | 366.5789     | 90.4056  |

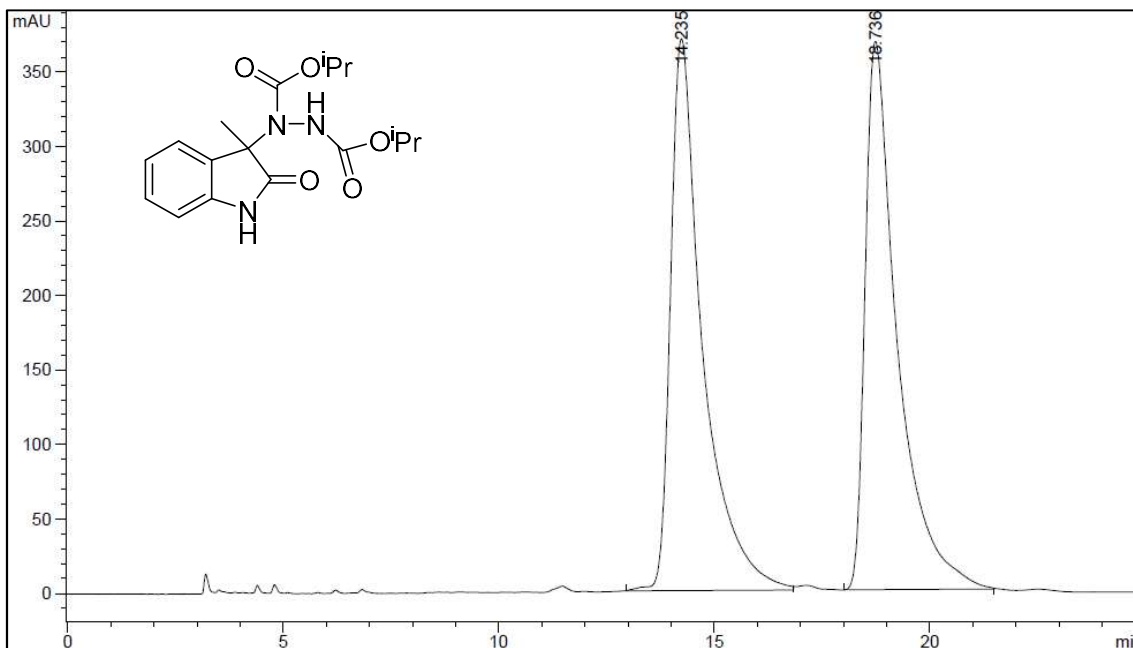

| Peak | Ret. Time (min) | Type | Width  | Area (mAU*s) | Height (mAU) | Area (%) |
|------|-----------------|------|--------|--------------|--------------|----------|
| 1    | 14.235          | BB   | 0.7498 | 19244.3      | 370.6246     | 50.0934  |
| 2    | 18.736          | BB   | 0.7538 | 19172.5      | 368.0325     | 49.9066  |

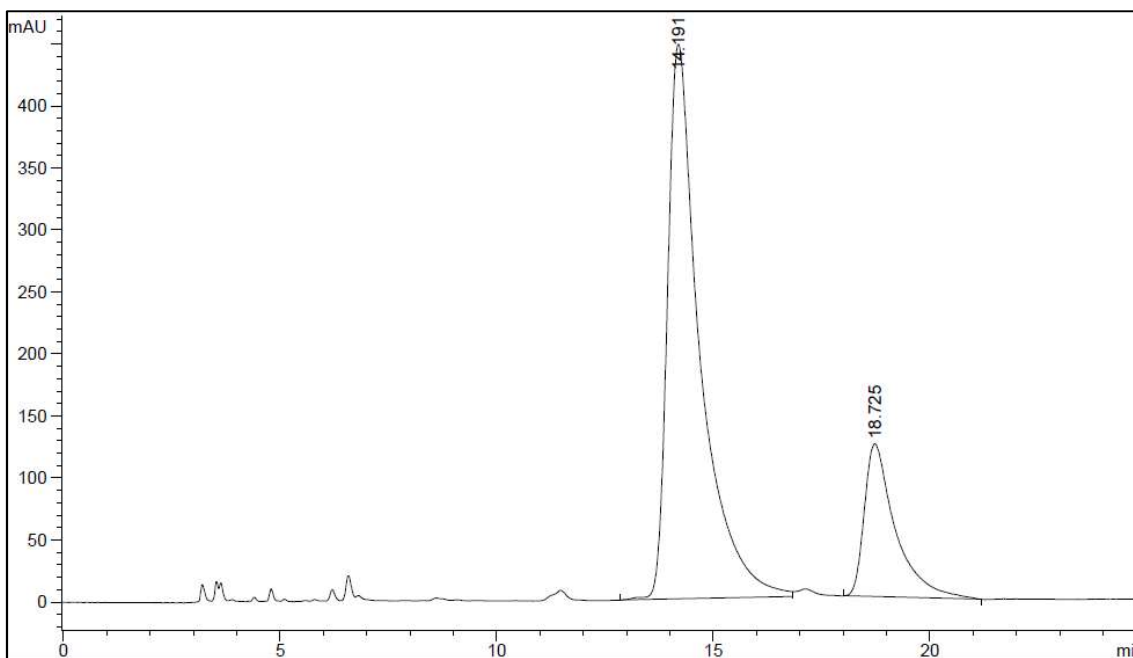

| Peak | Ret. Time (min) | Type | Width  | Area (mAU*s) | Height (mAU) | Area (%) |
|------|-----------------|------|--------|--------------|--------------|----------|
| 1    | 14.191          | BB   | 0.7561 | 23308.6      | 447.2088     | 79.1867  |
| 2    | 18.725          | BP   | 0.7102 | 6162.39      | 123.1996     | 20.8133  |

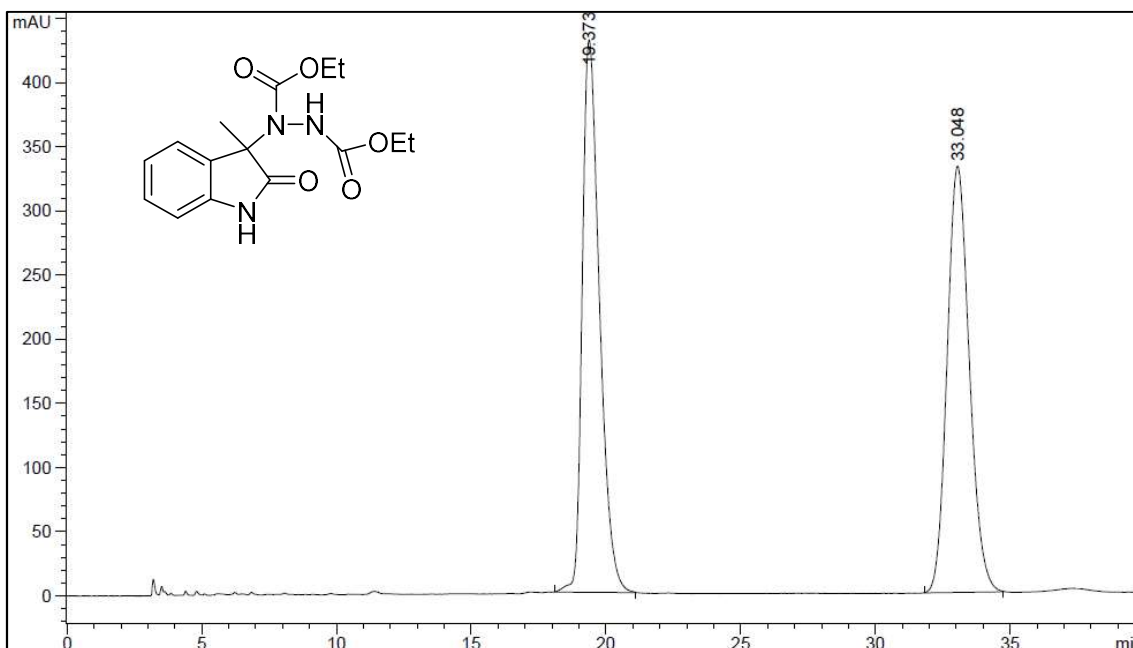

| Peak | Ret. Time (min) | Type | Width  | Area (mAU*s) | Height (mAU) | Area (%) |
|------|-----------------|------|--------|--------------|--------------|----------|
| 1    | 19.373          | BB   | 0.6791 | 19237.2      | 430.7054     | 50.2589  |
| 2    | 33.048          | BB   | 0.8866 | 19039.0      | 332.2327     | 49.7411  |

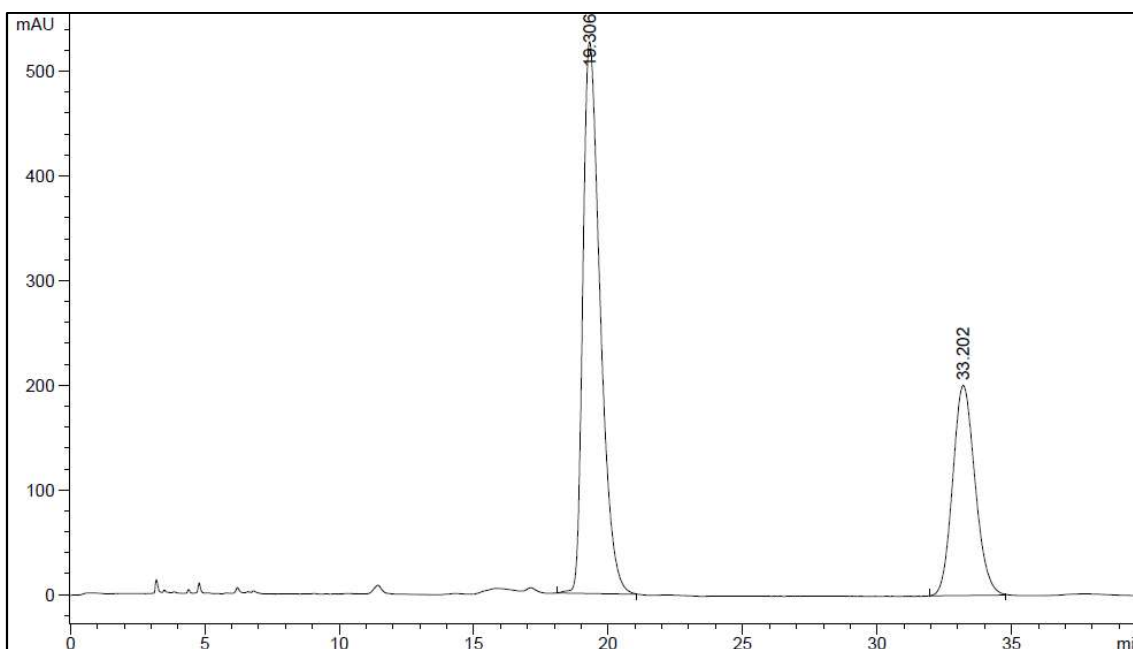

| Peak | Ret. Time (min) | Type | Width  | Area (mAU*s) | Height (mAU) | Area (%) |
|------|-----------------|------|--------|--------------|--------------|----------|
| 1    | 19.306          | BB   | 0.6736 | 23657.5      | 527.1194     | 67.0371  |
| 2    | 33.202          | BB   | 0.8699 | 11632.6      | 200.7762     | 32.9629  |

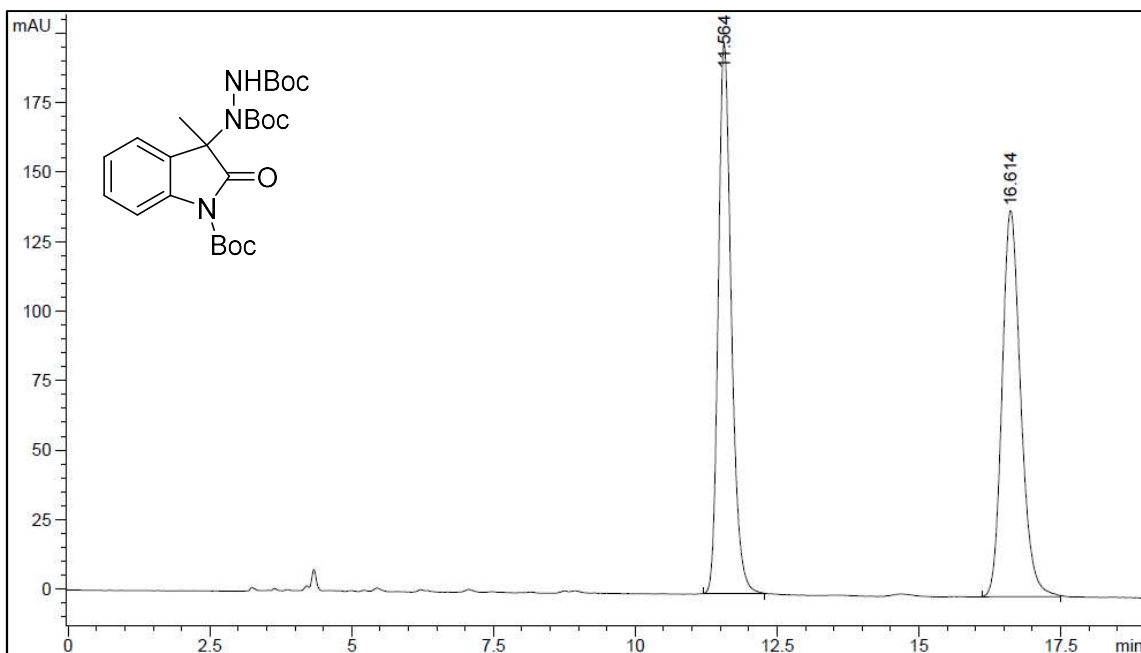

| Peak | Ret. Time (min) | Type | Width  | Area (mAU*s) | Height (mAU) | Area (%) |
|------|-----------------|------|--------|--------------|--------------|----------|
| 1    | 11.564          | BB   | 0.2456 | 3188.7012    | 198.3303     | 50.0607  |
| 2    | 16.614          | BB   | 0.3490 | 3180.9678    | 138.9911     | 49.9393  |

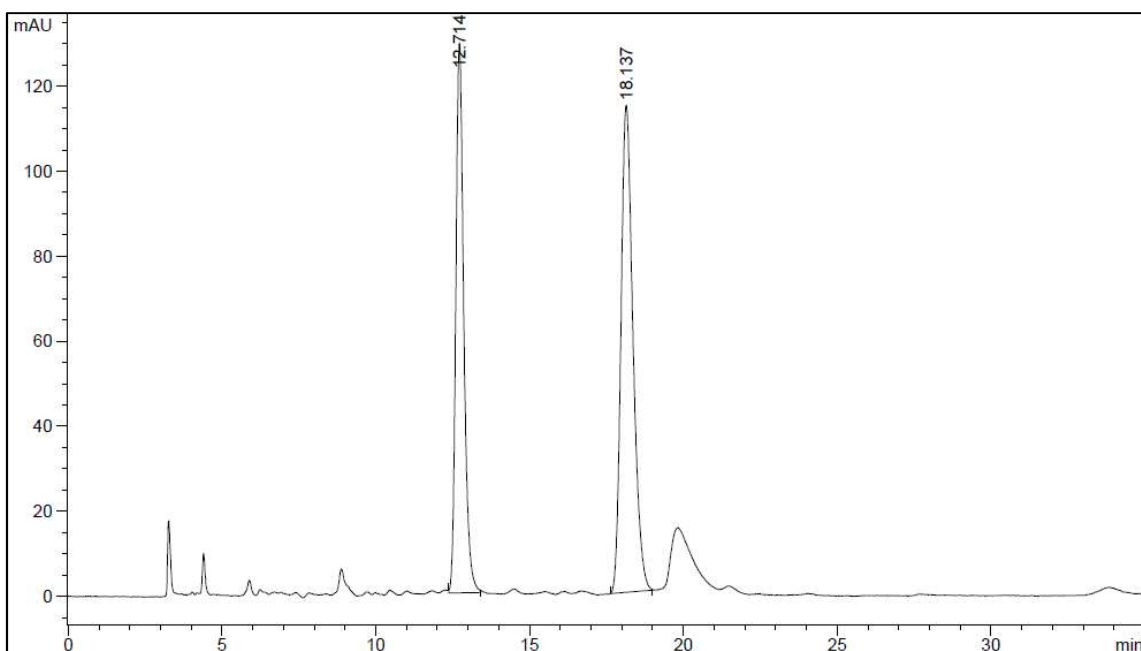

| Peak | Ret. Time (min) | Type | Width  | Area (mAU*s) | Height (mAU) | Area (%) |
|------|-----------------|------|--------|--------------|--------------|----------|
| 1    | 12.714          | BB   | 0.2735 | 2323.6633    | 129.3830     | 42.7526  |
| 2    | 18.137          | BB   | 0.4109 | 3111.4812    | 114.5361     | 57.2474  |



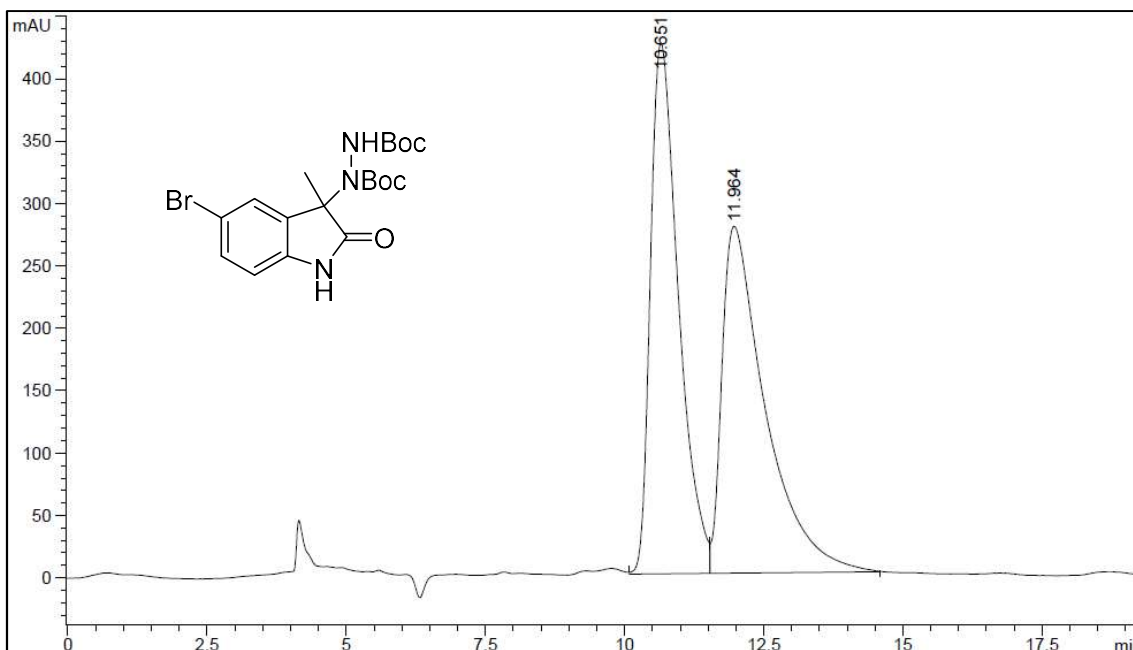

| Peak | Ret. Time (min) | Type | Width  | Area (mAU*s) | Height (mAU) | Area (%) |
|------|-----------------|------|--------|--------------|--------------|----------|
| 1    | 10.651          | VV   | 0.5367 | 14974.5      | 425.4253     | 49.8070  |
| 2    | 11.964          | VB   | 0.7691 | 15096.6      | 278.08582    | 50.1930  |

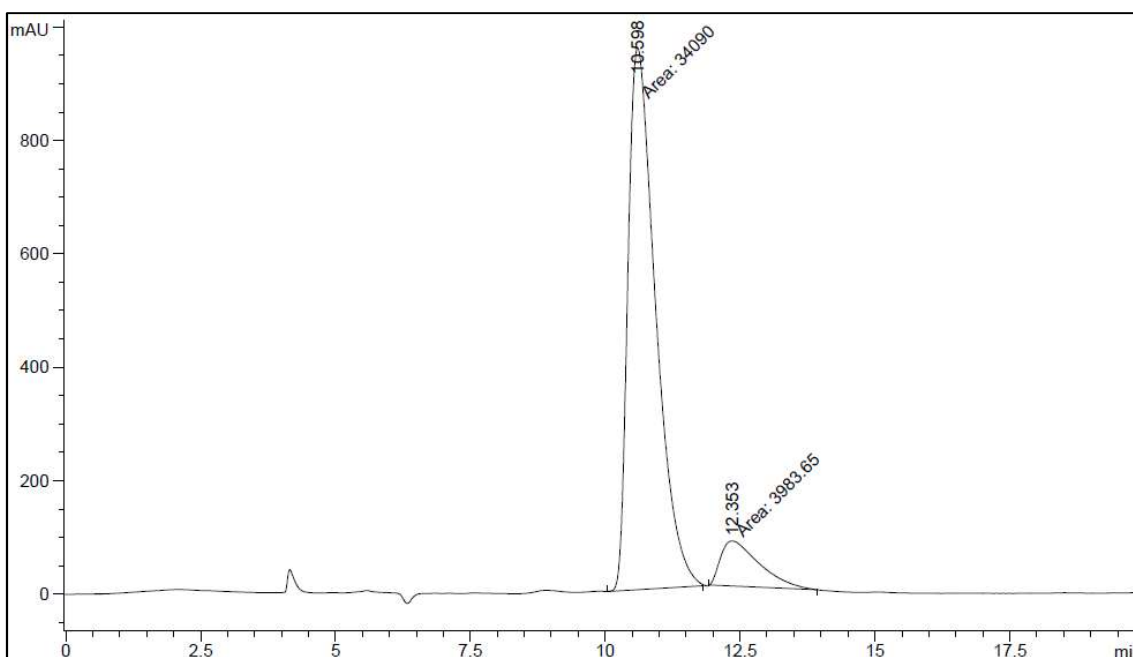

| Peak | Ret. Time (min) | Type | Width  | Area (mAU*s) | Height (mAU) | Area (%) |
|------|-----------------|------|--------|--------------|--------------|----------|
| 1    | 10.598          | MM   | 0.5941 | 34090.0      | 956.31854    | 89.5370  |
| 2    | 12.353          | MM   | 0.8341 | 3983.6533    | 79.60248     | 10.4630  |

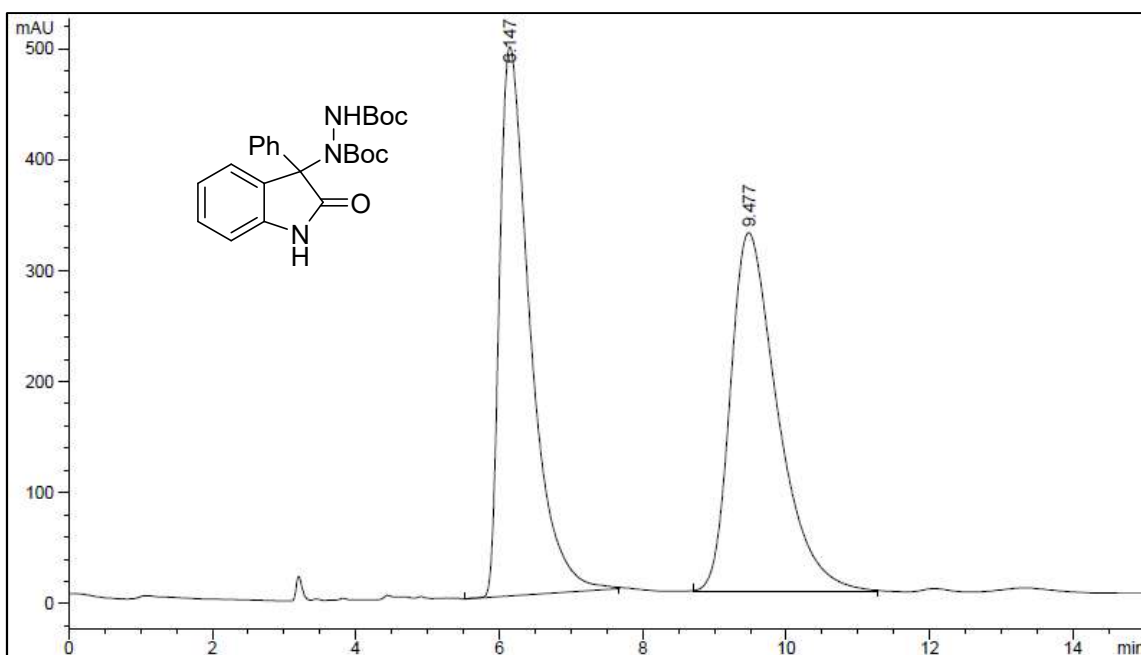

| Peak | Ret. Time (min) | Type | Width  | Area (mAU*s) | Height (mAU) | Area (%) |
|------|-----------------|------|--------|--------------|--------------|----------|
| 1    | 6.147           | PB   | 0.4498 | 14661.3      | 494.65549    | 49.8696  |
| 2    | 9.477           | BB   | 0.6826 | 14738.0      | 322.85226    | 50.1304  |

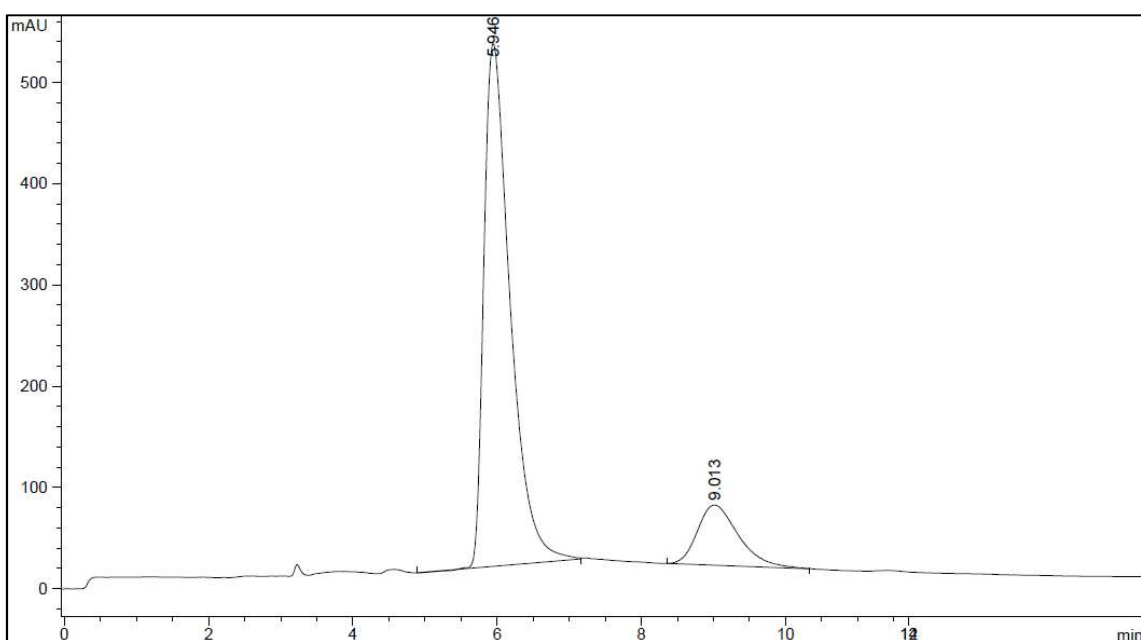

| Peak | Ret. Time (min) | Type | Width  | Area (mAU*s) | Height (mAU) | Area (%) |
|------|-----------------|------|--------|--------------|--------------|----------|
| 1    | 5.964           | VB   | 0.3857 | 13082.7      | 516.24579    | 84.7728  |
| 2    | 9.013           | BB   | 0.5668 | 2349.954     | 59.49723     | 15.2272  |

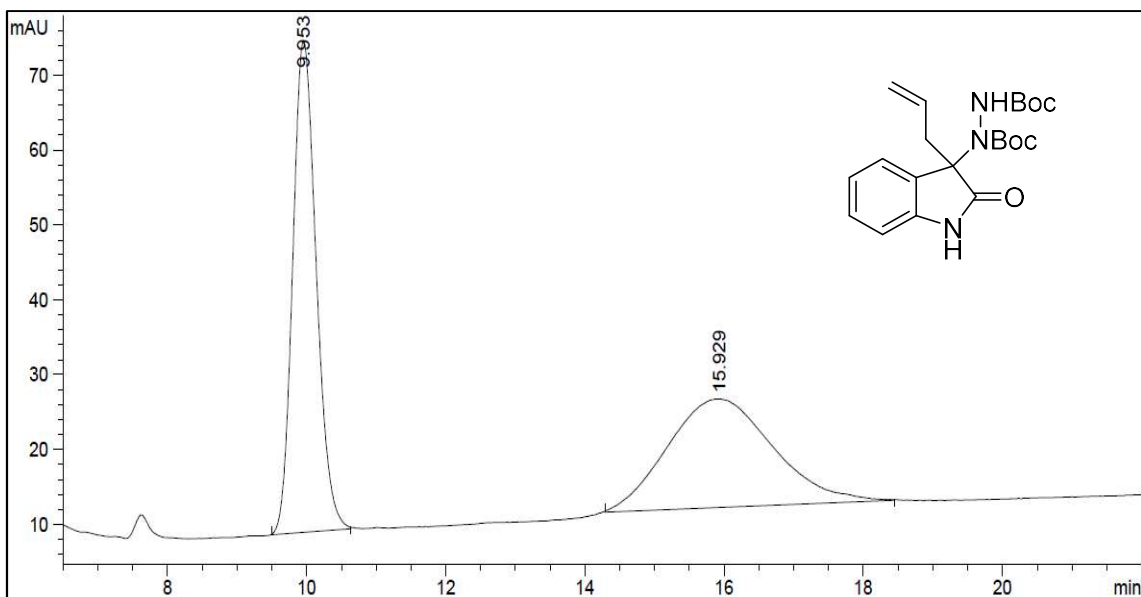

| Peak | Ret. Time (min) | Type | Width  | Area (mAU*s) | Height (mAU) | Area (%) |
|------|-----------------|------|--------|--------------|--------------|----------|
| 1    | 9.953           | BB   | 0.3634 | 1540.6179    | 65.7352      | 50.1185  |
| 2    | 15.929          | BB   | 1.2487 | 1533.3331    | 14.5357      | 49.8815  |

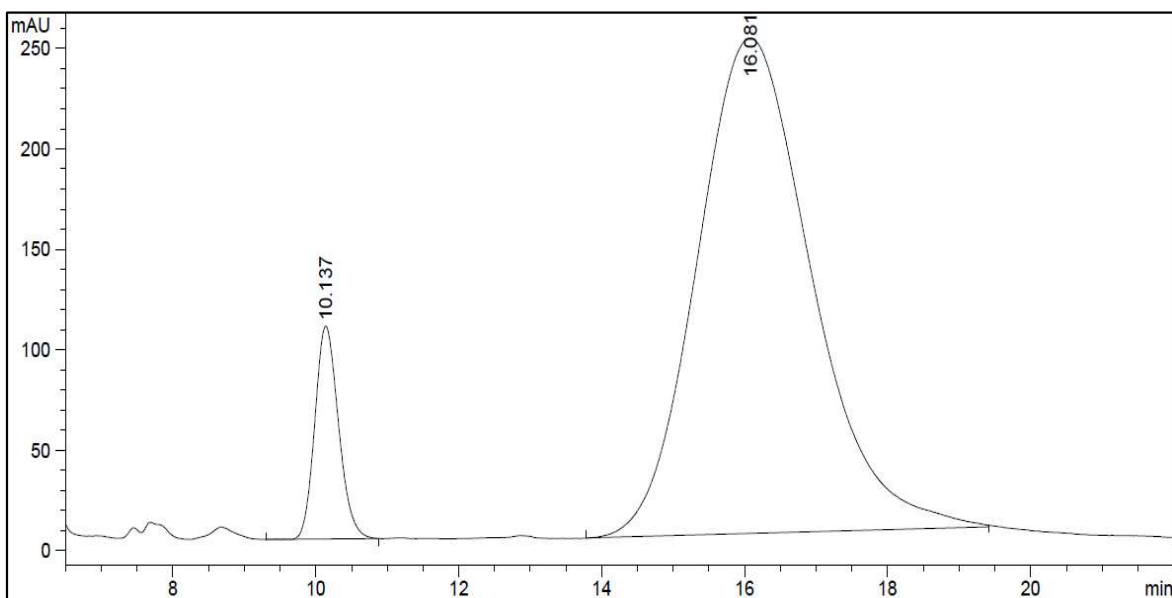

| Peak | Ret. Time (min) | Type | Width  | Area (mAU*s) | Height (mAU) | Area (%) |
|------|-----------------|------|--------|--------------|--------------|----------|
| 1    | 10.137          | VP   | 0.3573 | 2448.72      | 706.0745     | 8.2257   |
| 2    | 16.081          | PB   | 1.3565 | 27320.6      | 246.6083     | 91.7743  |

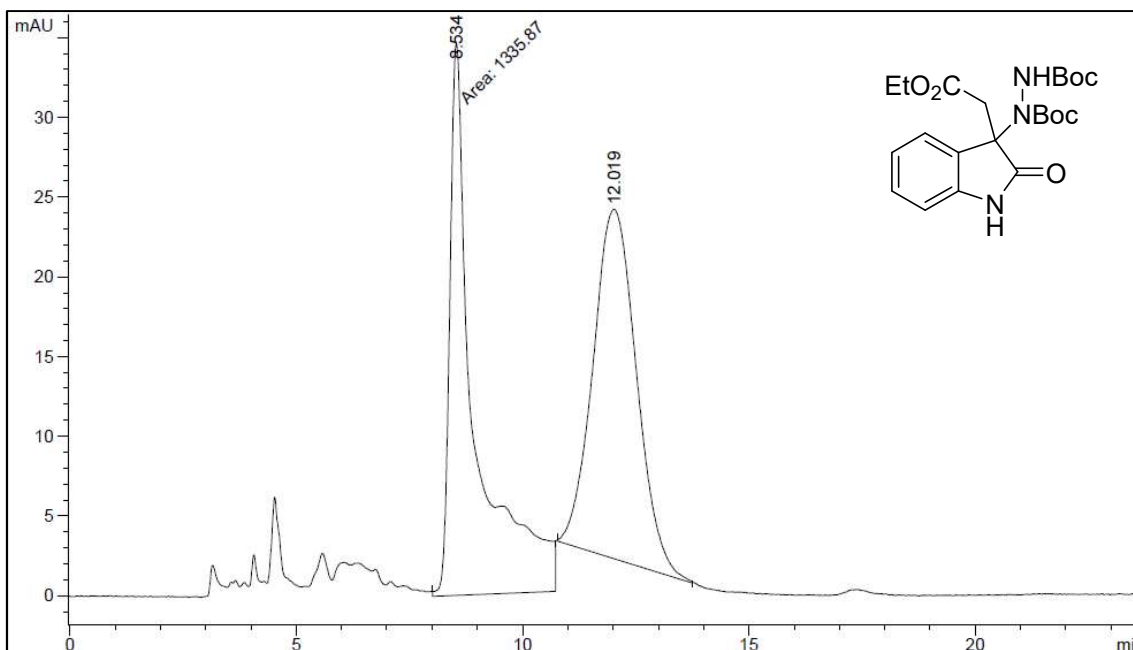

| Peak | Ret. Time (min) | Type | Width  | Area (mAU*s) | Height (mAU) | Area (%) |
|------|-----------------|------|--------|--------------|--------------|----------|
| 1    | 8.534           | MM   | 0.6425 | 1335.8685    | 34.6539      | 47.7692  |
| 2    | 12.019          | BB   | 0.8237 | 1460.6367    | 21.9113      | 52.2308  |

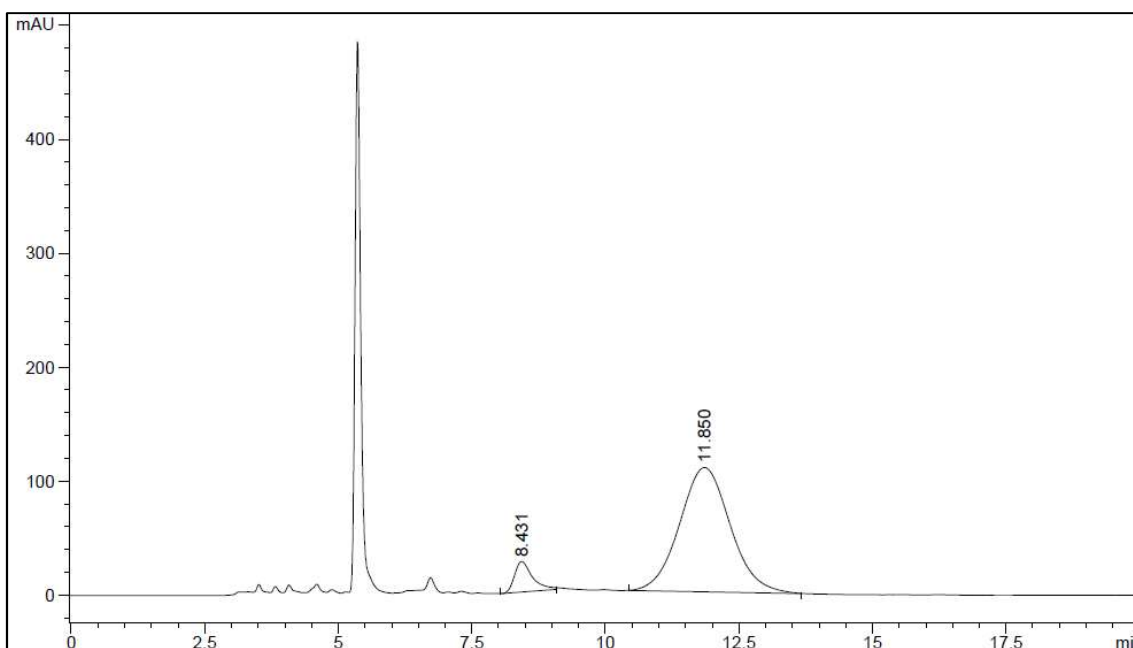

| Peak | Ret. Time (min) | Type | Width  | Area (mAU*s) | Height (mAU) | Area (%) |
|------|-----------------|------|--------|--------------|--------------|----------|
| 1    | 8.431           | PB   | 0.3431 | 623.48779    | 26.83226     | 7.9315   |
| 2    | 11.850          | BB   | 0.9975 | 7237.4639    | 109.1691     | 92.0685  |

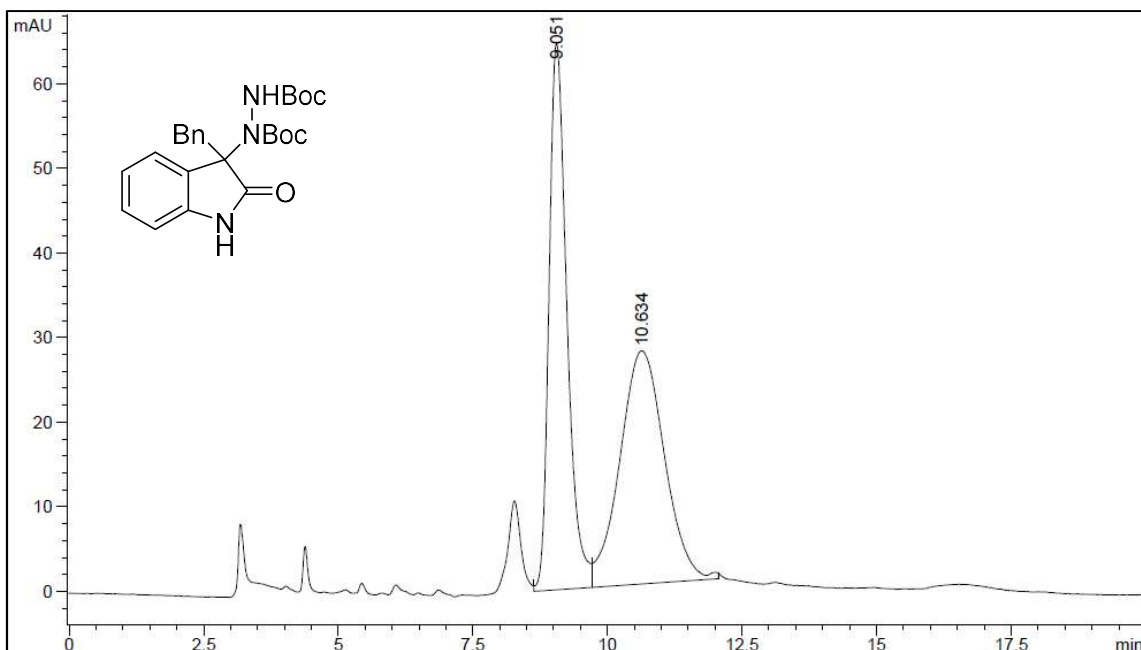

| Peak | Ret. Time (min) | Type | Width  | Area (mAU*s) | Height (mAU) | Area (%) |
|------|-----------------|------|--------|--------------|--------------|----------|
| 1    | 9.051           | VB   | 0.3512 | 1492.0859    | 64.6549      | 48.3524  |
| 2    | 10.634          | BB   | 0.8401 | 1593.7694    | 27.5827      | 51.6476  |

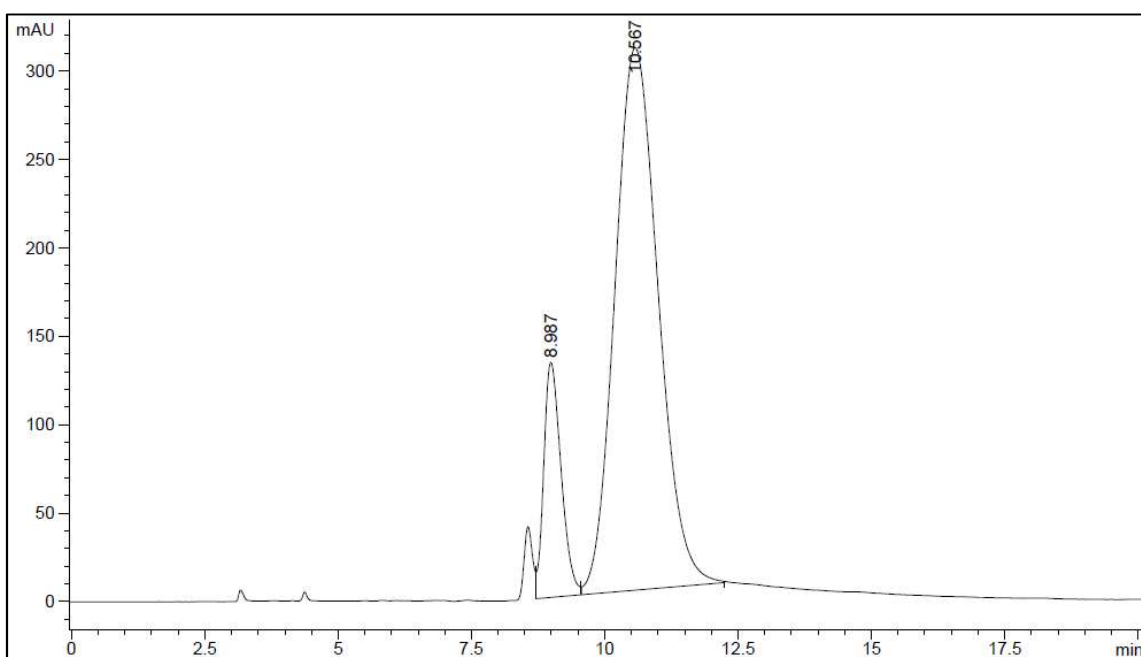

| Peak | Ret. Time (min) | Type | Width  | Area (mAU*s) | Height (mAU) | Area (%) |
|------|-----------------|------|--------|--------------|--------------|----------|
| 1    | 8.987           | VV   | 0.3482 | 3008.699     | 132.8618     | 14.7821  |
| 2    | 10.567          | VB   | 0.8680 | 17344.9      | 306.5994     | 85.2179  |

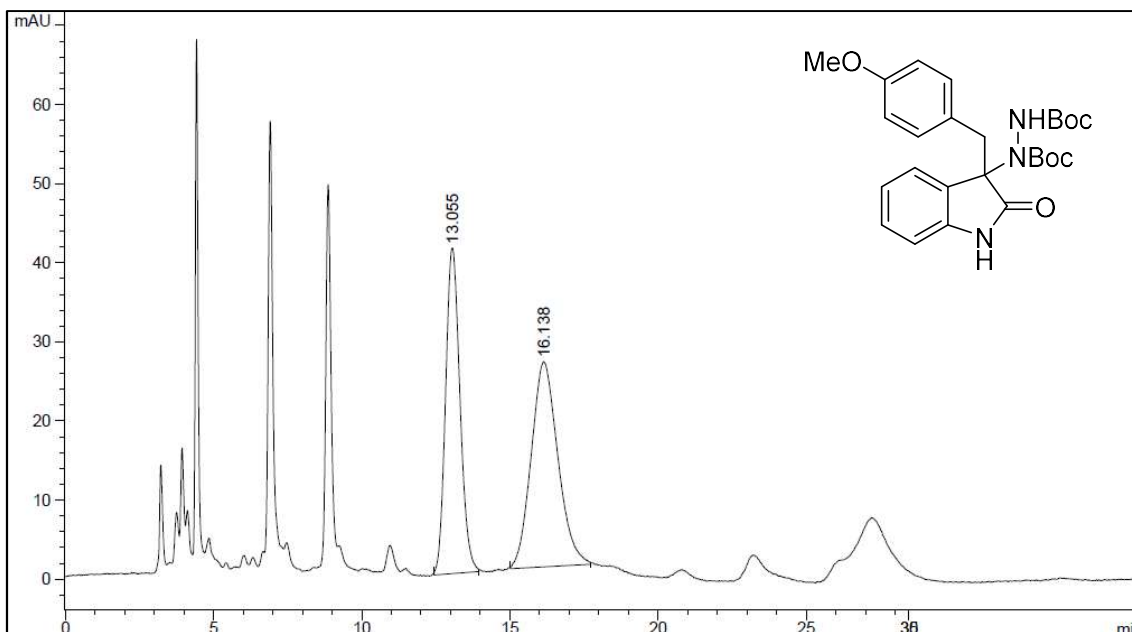

| Peak | Ret. Time (min) | Type | Width  | Area (mAU*s) | Height (mAU) | Area (%) |
|------|-----------------|------|--------|--------------|--------------|----------|
| 1    | 13.055          | BB   | 0.5158 | 1389.5295    | 41.1617      | 46.1309  |
| 2    | 16.138          | BB   | 0.7455 | 1622.6172    | 25.9500      | 53.8691  |

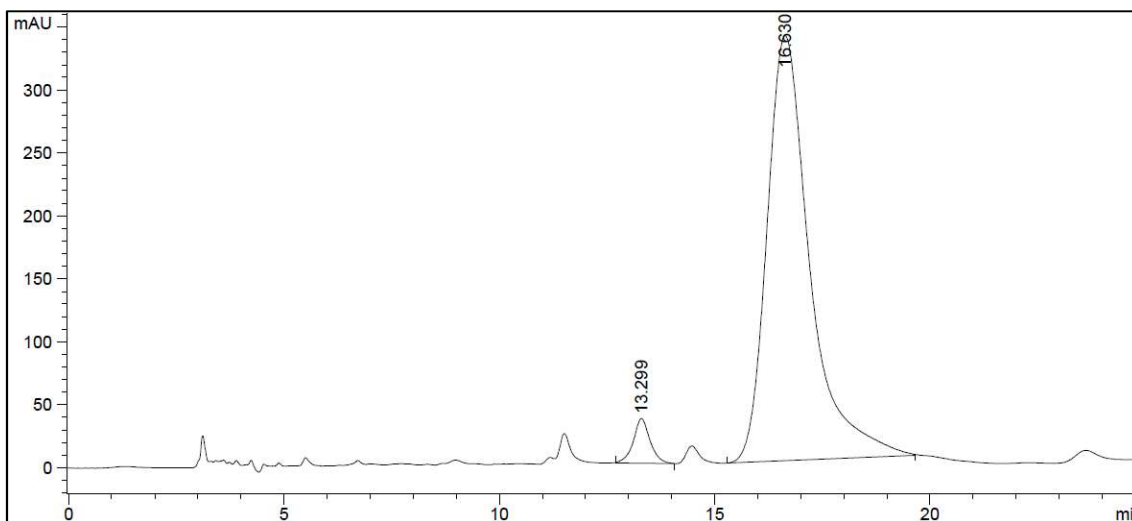

| Peak | Ret. Time (min) | Type | Width  | Area (mAU*s) | Height (mAU) | Area (%) |
|------|-----------------|------|--------|--------------|--------------|----------|
| 1    | 13.299          | BP   | 0.3952 | 960.2463     | 35.53962     | 3.9522   |
| 2    | 16.630          | PB   | 0.9999 | 23336.0      | 337.82153    | 96.0478  |

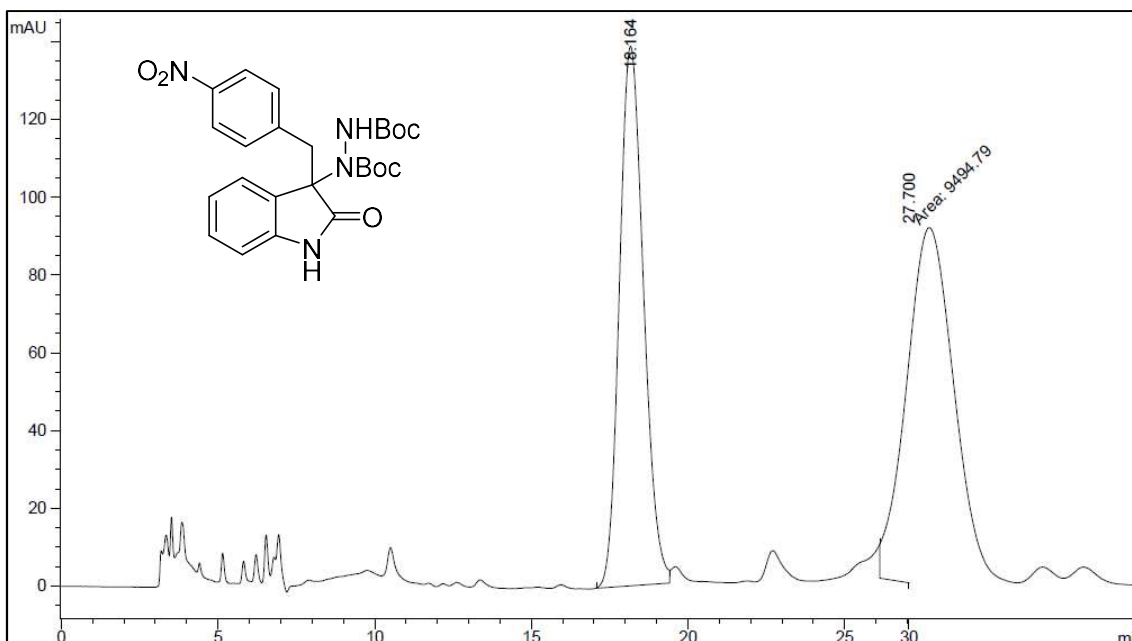

| Peak | Ret. Time (min) | Type | Width  | Area (mAU*s) | Height (mAU) | Area (%) |
|------|-----------------|------|--------|--------------|--------------|----------|
| 1    | 18.164          | BV   | 0.8445 | 7428.111     | 138.768      | 43.8938  |
| 2    | 27.700          | FN   | 1.7472 | 9494.792     | 90.570       | 56.1062  |

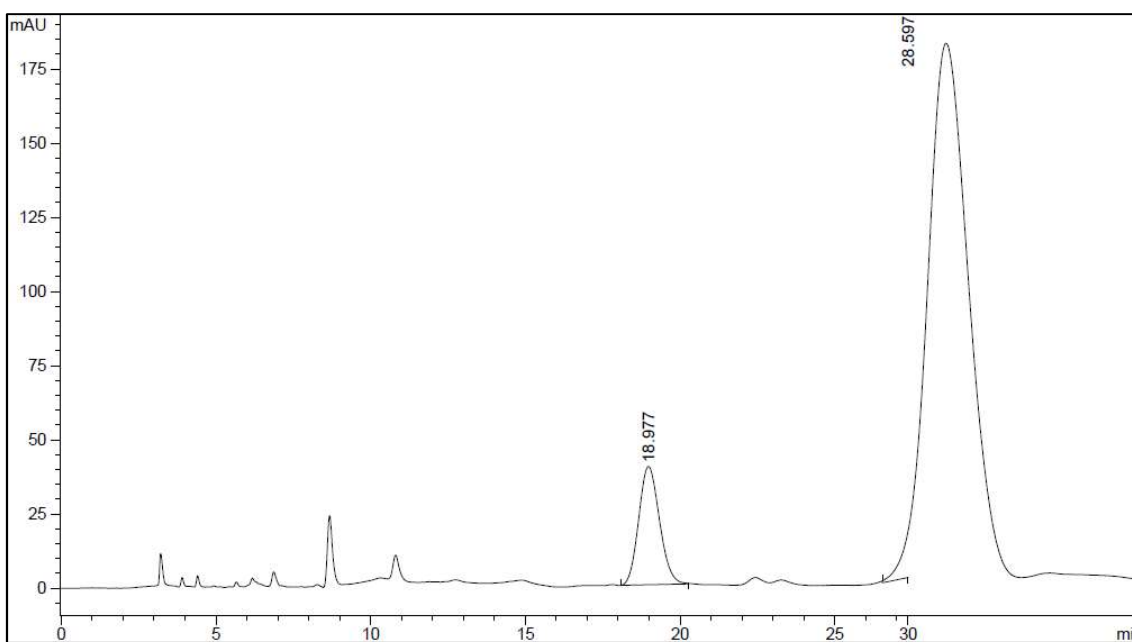

| Peak | Ret. Time (min) | Type | Width  | Area (mAU*s) | Height (mAU) | Area (%) |
|------|-----------------|------|--------|--------------|--------------|----------|
| 1    | 18.977          | PB   | 0.7250 | 1863.005     | 39.8824      | 9.9558   |
| 2    | 28.597          | BP   | 1.3717 | 16849.7      | 181.0661     | 90.0442  |

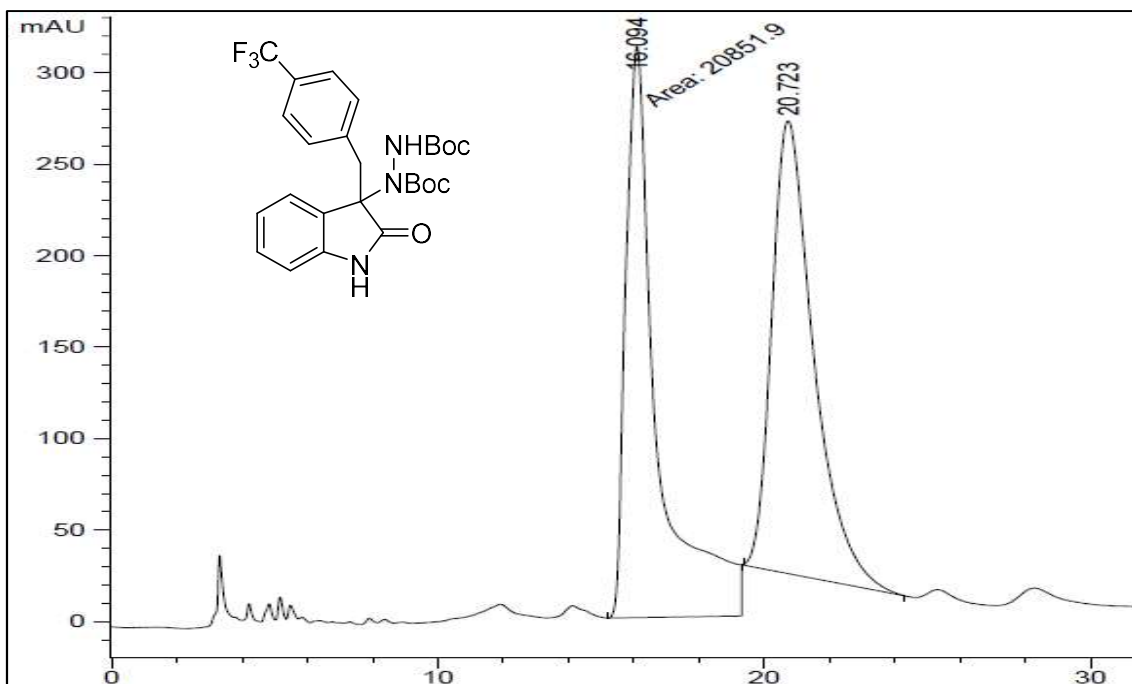

| Peak | Ret. Time (min) | Type | Width  | Area (mAU*s) | Height (mAU) | Area (%) |
|------|-----------------|------|--------|--------------|--------------|----------|
| 1    | 16.094          | MM   | 1.1134 | 20851.9      | 312.13074    | 48.5496  |
| 2    | 20.723          | BB   | 1.2880 | 22097.8      | 247.42282    | 51.4504  |

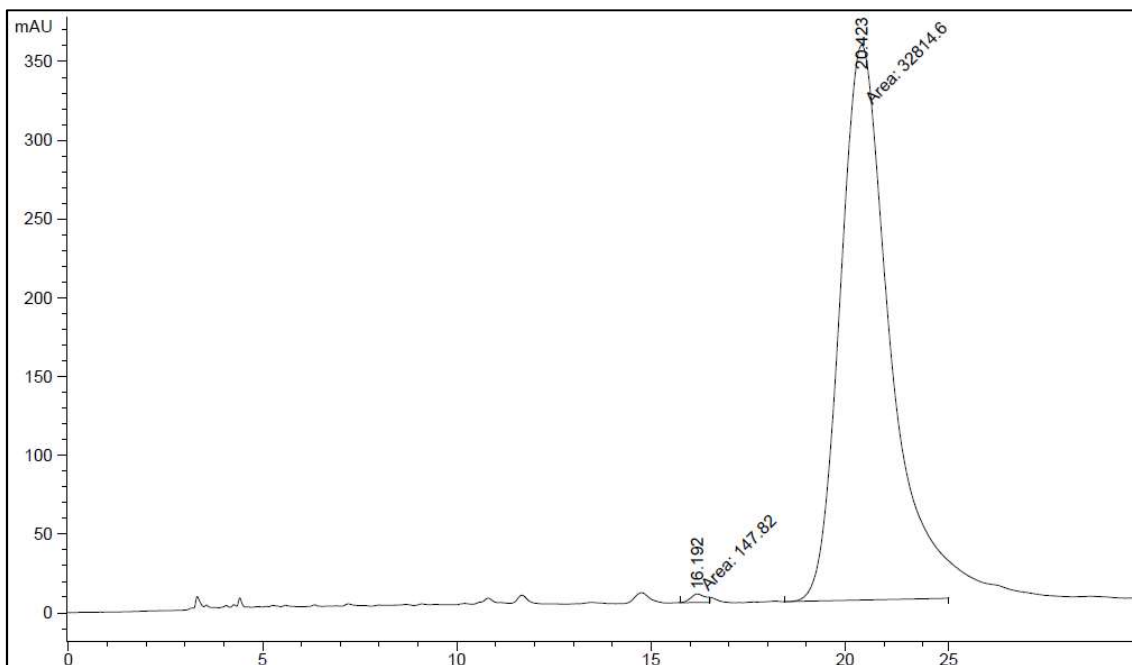

| Peak | Ret. Time (min) | Type | Width  | Area (mAU*s) | Height (mAU) | Area (%) |
|------|-----------------|------|--------|--------------|--------------|----------|
| 1    | 16.192          | MF   | 0.4519 | 147.819      | 5.45208      | 0.4484   |
| 2    | 20.423          | MM   | 1.5504 | 32814.6      | 352.74606    | 99.5516  |



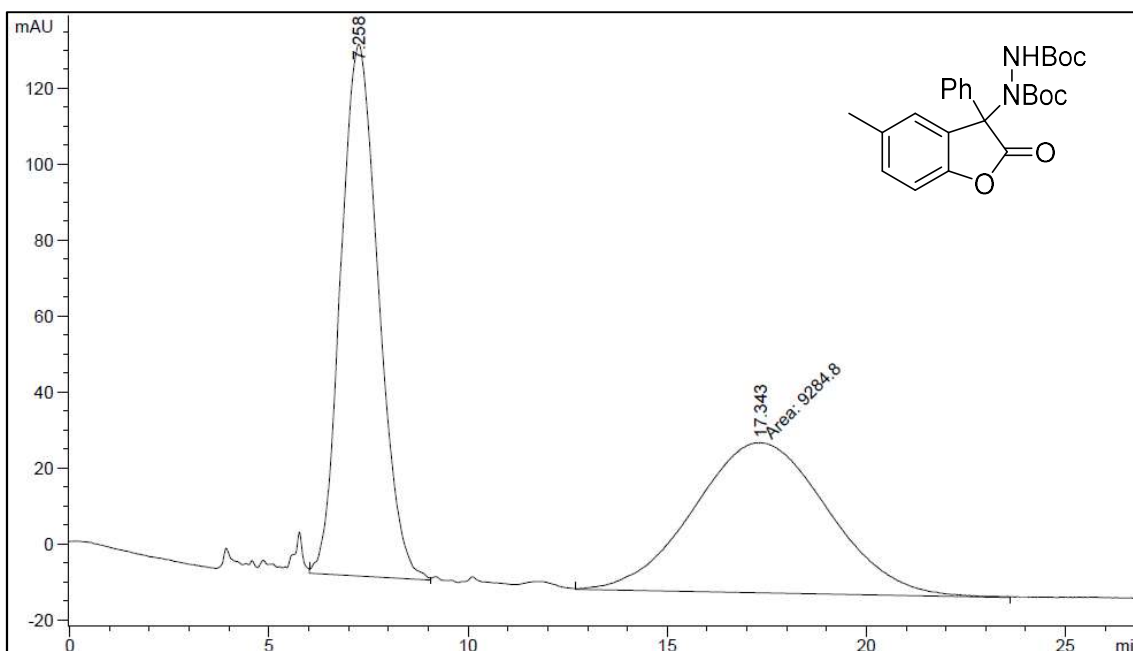

| Peak | Ret. Time (min) | Type | Width  | Area (mAU*s) | Height (mAU) | Area (%) |
|------|-----------------|------|--------|--------------|--------------|----------|
| 1    | 7.258           | VV   | 0.9189 | 9241.4785    | 140.2176     | 49.8831  |
| 2    | 17.343          | MM   | 3.9054 | 9284.8037    | 39.62373     | 50.1169  |

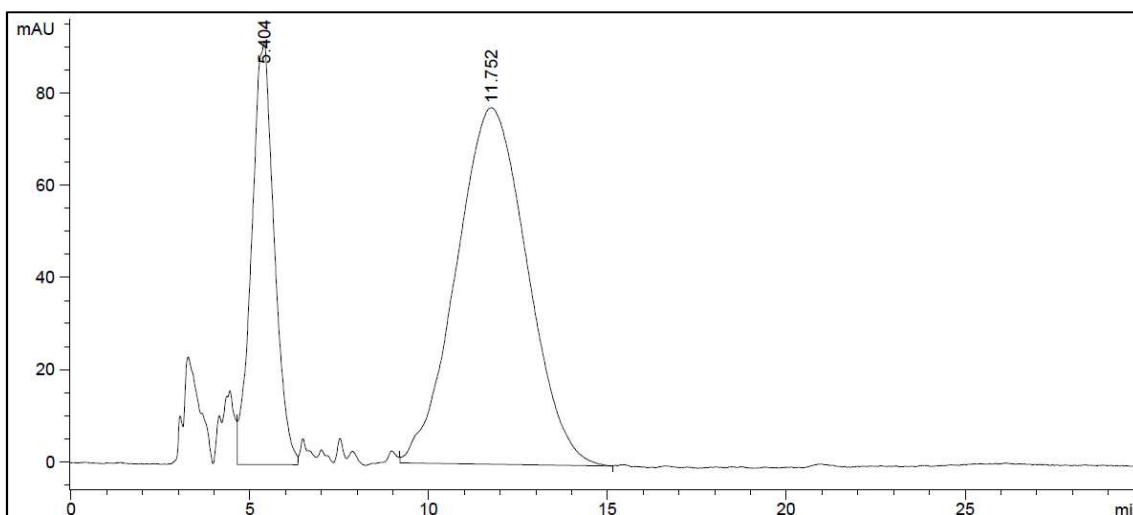

| Peak | Ret. Time (min) | Type | Width  | Area (mAU*s) | Height (mAU) | Area (%) |
|------|-----------------|------|--------|--------------|--------------|----------|
| 1    | 5.404           | VV   | 0.5489 | 4027.6177    | 91.9744      | 22.4346  |
| 2    | 11.752          | VP   | 1.6163 | 10645.2      | 77.3761      | 77.5654  |
